1                    Recurrent erosion of *COA1/MITRAC15* demonstrates gene  
2                    dispensability in oxidative phosphorylation

3                    Sagar Sharad Shinde<sup>1</sup>, Sandhya Sharma<sup>1</sup>, Lokdeep Teekas<sup>1</sup>, Ashutosh Sharma<sup>1</sup>, Nagarjun Vijay<sup>1</sup>

4                    <sup>1</sup>Computational Evolutionary Genomics Lab, Department of Biological Sciences, IISER Bhopal,  
5                    Bhauri, Madhya Pradesh, India

6                    \*Correspondence: [nagarjun@iiserb.ac.in](mailto:nagarjun@iiserb.ac.in)

7

8

9

10

11

12

13

14

15

16

17

18

19

20

21

22

23

24

25

## 26 Abstract

27 Skeletal muscle fibers rely upon either oxidative phosphorylation or glycolytic pathway to  
28 achieve muscular contractions that power mechanical movements. Species with energy-  
29 intensive adaptive traits that require sudden bursts of energy have a greater dependency on  
30 fibers that use the glycolytic pathway. Glycolytic fibers have decreased reliance on OXPHOS  
31 and lower mitochondrial content compared to oxidative fibers. Hence, we hypothesized that  
32 adaptive gene loss might have occurred within the OXPHOS pathway in lineages that largely  
33 depend on glycolytic fibers. The protein encoded by the *COA1/MITRAC15* gene with  
34 conserved orthologs found in budding yeast to humans promotes mitochondrial translation.  
35 We show that gene disrupting mutations have accumulated within the *COA1/MITRAC15*  
36 gene in the cheetah, several species of galliforms, and rodents. The genomic region  
37 containing *COA1/MITRAC15* is a well-established evolutionary breakpoint region in  
38 mammals. Careful inspection of genome assemblies of closely related species of rodents and  
39 marsupials suggests two independent *COA1/MITRAC15* gene loss events co-occurring with  
40 chromosomal rearrangements. Besides recurrent gene loss events, we document changes in  
41 *COA1/MITRAC15* exon structure in primates and felids. The detailed evolutionary history  
42 presented in this study reveals the intricate link between skeletal muscle fiber composition  
43 and dispensability of the chaperone-like role of the *COA1/MITRAC15* gene.

44 **Keywords:** Cytochrome C Oxidase Assembly Factor 1, *COA1*, *MITRAC15*, Chicken, gene  
45 loss, rodent

## 46 1. Introduction

47 Skeletal muscles control numerous locomotor functions in vertebrates (Weeks, 1989). The  
48 hundreds of different muscles in the body consist of highly organized heterogeneous bundles  
49 of fibers. These muscle fibers are classified based on contractile properties, power source,  
50 and myosin component into type-1, 2A, 2B, and 2X (Talbot and Maves, 2016). Muscles with  
51 type-1 and type-2A fibers rely on the oxidative phosphorylation (OXPHOS) pathway, the  
52 primary source of ATP needed for locomotion and other energy-intensive tasks (Shen et al.,  
53 2010). The energy releasing electron transport chain (ETC) coupled with the energy-requiring  
54 chemiosmosis is known as (OXPHOS) (Hatefi, 1985; Mitchell, 1961). A chain of  
55 mitochondrial inner membrane-embedded proteins encoded by both mitochondrial and  
56 nuclear genes form four large complexes that transport electrons through redox reactions. The  
57 energy released during these reactions results in a proton gradient, which uses a fifth  
58 membrane-embedded complex to generate ATP through chemiosmosis. Optimization of  
59 crucial steps in the OXPHOS pathway leads to improved locomotor performance (Conley,  
60 2016). Origin of novel energetically demanding phenotypes has been possible through  
61 adaptations in the OXPHOS pathway (Doan et al., 2004; Garvin et al., 2015; Wu et al., 2000;  
62 Zhang and Broughton, 2015). Multiple genes of the OXPHOS pathway are under positive  
63 selection in mammalian species with high energy demanding adaptations such as powered  
64 flight in bats (Shen et al., 2010), survival of polar bears in cold Arctic environment (Welch et  
65 al., 2014), high altitude adaptation in yak (Qiu et al., 2012), hypoxia tolerance in cetaceans

66 (Tian et al., 2018), ecotype specific divergence in killer whales (Foote et al., 2011) and  
67 evolution of large brains in anthropoid primates (Grossman et al., 2004).

68

69 The loss of energetically demanding phenotypes reduces the strength of purifying selection  
70 acting on the OXPHOS pathway. For instance, the domestication of dogs (Björnerfeldt et al.,  
71 2006) and degeneration of locomotor abilities in birds (Shen et al., 2009) resulted in relaxed  
72 selective constraint on the OXPHOS pathway proteins. Among other carnivores and rodents,  
73 the great diversity of functionally important locomotor habits have variations in energy  
74 requirements and corresponding differences in the magnitude of purifying selection (Samuels  
75 and Van Valkenburgh, 2008; Taylor, 1989). Even within the same species, mitochondrially  
76 encoded protein components of the OXPHOS pathway are under stronger purifying selection  
77 than those protein components encoded by the nuclear genome (Popadin et al., 2013). These  
78 differing purifying selection levels are due to gene expression level differences between  
79 nuclear and mitochondrial OXPHOS genes (Nabholz et al., 2013). Despite the movement of  
80 most genes from the ancestral mitochondria to the nucleus in eukaryotes, a separate  
81 mitochondrial organelle is well conserved with scarce exceptions (Karnkowska et al., 2016;  
82 Sloan et al., 2018). Turnover in the content of mitochondrial protein complexes has mainly  
83 occurred before the emergence of eukaryotes with few gene gain/loss events reported in  
84 vertebrates (Adams and Palmer, 2003; Cardol, 2011; Gabaldón et al., 2005; Gabaldón and  
85 Huynen, 2007; Huynen et al., 2013; van Esveld and Huynen, 2018). However, lineage-  
86 specific gene loss from the mitochondria has occurred in nonbilaterian organisms (Lavrov  
87 and Pett, 2016), other metazoan lineages (Gissi et al., 2008), and plants (Depamphilis et al.,  
88 1997; Palmer et al., 2000). The duplication of mitochondrial genes in bird lineages followed  
89 by gene loss and genomic rearrangement events is relatively unique (Akiyama et al., 2017;  
90 Mackiewicz et al., 2019; San Mauro et al., 2006; Urantówka et al., 2020).

91 The proton gradient established by the ETC also powers the generation of heat in mammalian  
92 Non-Shivering Thermogenesis (NST) (Nedergaard et al., 2001). Thermogenin or uncoupling  
93 protein 1 (*UCPI*) expressed in the inner mitochondrial membrane facilitates the regulated  
94 leakage of protons to generate heat in brown adipose tissue (Krauss et al., 2005). The *UCPI*  
95 gene is absent in all birds (Newman et al., 2013) and some mammals (Emre et al., 2007;  
96 Mcgaugh and Schwartz, 2017) despite its presence in fish (Jastroch et al., 2005), amphibians  
97 (Hughes et al., 2009), and marsupials (Polymeropoulos et al., 2012). The integration of *UCPI*  
98 in the thermogenic pathway is considered a eutherian-mammal-specific adaptation unrelated  
99 to its ancestral innate immune functions (Jastroch, 2017). The exceptional repeated loss of  
100 this mitochondrial membrane protein in vertebrate lineages appears to result from its  
101 changing functional roles (Gaudry et al., 2017; Mcgaugh and Schwartz, 2017). In contrast to  
102 *UCPI*, most OXPHOS pathway genes are highly conserved, and defective protein  
103 components generally result in clinical phenotypes (Hock et al., 2020). The proteins  
104 *TMEM186* and *COA1/MITRAC15* are chaperones interacting with the Mitochondrial  
105 Complex I Assembly (MCIA) complex, and defects in these genes do not result in any  
106 clinical phenotypes (Hock et al., 2020; Signes and Fernandez-Vizarra, 2018).

107 Functional studies have implicated a role for *COA1/MITRAC15* in promoting mitochondrial  
108 translation and complex I and IV biogenesis (Wang et al., 2020). However, overexpression of  
109 other genes easily compensates for the mild effect of *COA1/MITRAC15* gene knockout (Hess  
110 et al., 2009; Pierrel et al., 2007). Notably, the *COA1/MITRAC15* gene was also identified as a  
111 positively selected gene in a genome-wide screen in primates (Van Der Lee et al., 2017) and  
112 suggests that despite its mild phenotype, *COA1/MITRAC15* can contribute to fitness increases  
113 through its role as a chaperone. *COA1/MITRAC15* resembles *TIMM21*, a subunit of the  
114 *TIM23* complex (Mick et al., 2012). Such *TIMM21* gene duplicates interacting with the  
115 mitochondrial import apparatus and respiratory chain complexes occur in Arabidopsis  
116 (Murcha et al., 2014). Diversification of the mitochondrial import system has benefitted from  
117 gene duplication events that have contributed new members to the Translocase of the Inner  
118 Membrane (TIM) and Translocase of the Outer Membrane (TOM) protein complexes  
119 (Fukasawa et al., 2017). Hence, it is plausible that *COA1/MITRAC15* results from a  
120 duplication of the *TIMM21* gene followed by divergence.

121 Divergence of conventional or class-2 myosin genes after duplication has led to the  
122 diversification of the *MYH* gene family (Moore et al., 1993; Weiss and Leinwand, 1996).  
123 These myosin genes have distinct functions defined by their contractile properties and  
124 ATPase activity (Resnicow et al., 2010). While *MYH7* and *MYH2* expressing fibers rely upon  
125 the OXPHOS pathway, *MYH1* and *MYH4* expressing fibers are dependent on the glycolytic  
126 pathway. The protein encoded by the *MYH7* gene occurs in both cardiac muscles and the  
127 slow-contracting type-1 fibers (Schiaffino and Reggiani, 2011). However, the *MYH* genes  
128 expressed in type-2 fibers are restricted mainly to skeletal muscles. The fast-contracting type-  
129 2 fibers power explosive movements like jumping and sprinting. Such rapid movements form  
130 an essential component of hunting strategies used by terrestrial predators and the escape  
131 strategy of the prey (Kohn, 2014; J. W. Wilson et al., 2013). Felids, small-bodied rodents,  
132 marsupials, certain cervids, and galliform birds have exceptional adaptations for rapid  
133 locomotion.

134 The world's fastest mammal, the cheetah (*Acinonyx jubatus*), epitomizes the relevance of  
135 speed and acceleration (A. M. Wilson et al., 2013). In general, felids are adept at sprinting  
136 and can accelerate more rapidly than canids but cannot sustain it for a prolonged period  
137 (Bailey et al., 2013). The predominance of type-2X fibers in felid species provides the ability  
138 to achieve rapid acceleration (Hyatt et al., 2010; Kohn et al., 2011; Williams et al., 1997).  
139 Compared to canids, felids have a greater reliance on glycolytic fibers. Glycolytic fibers have  
140 decreased reliance on OXPHOS and lower mitochondrial content than oxidative fibers  
141 (Mishra et al., 2015; Picard et al., 2012). Hence, the OXPHOS pathway might be under  
142 stronger selective constraint in canids than felids. Like these predators, prey species like  
143 antelopes are fast sprinters but have the added advantage of resistance to fatigue. The high  
144 speed of these species relies on type-2X fibers with high glycolytic capacities, and the added  
145 resistance to fatigue is possible due to the remarkable oxidative ability of these fibers (Curry  
146 et al., 2012). The use of both glycolytic and oxidative pathways suggests the OXPHOS  
147 pathway in these antelope species and other cervids would be under strong purifying  
148 selection.

149 Despite drastic variation in body size within mammals, the relative speed of locomotion is  
150 thought to be largely independent of body mass, at least in small mammals (Iriarte-Díaz,  
151 2002). The higher relative speed of small mammals results from faster constrictor made  
152 possible by the higher proportion of fast fibers (mostly 2X and 2B) in each muscle  
153 (Schiaffino and Reggiani, 2011). For instance, rodent limb muscles are known to have more  
154 abundant type 2B fibers compared to larger mammals (including humans, which have no type  
155 2B fibers in the limb muscles) (Kohn, 2014; Kohn and Myburgh, 2007). Marsupial species  
156 also have high relative speeds and possess muscle fibers equivalent to eutherian mammals  
157 (Zhong et al., 2001). The smaller marsupial species have type-2B and 2X muscle fibers in  
158 several important muscles (Zhong et al., 2008). The higher proportion of fast glycolytic fibers  
159 in rodents and marsupials potentially results in relaxed selection on the OXPHOS pathway  
160 genes in these species.

161 The ability to fly is a distinctive feature of birds except for lineages that have become entirely  
162 flightless or retain only a limited flying capacity (Harshman et al., 2008; Pan et al., 2019;  
163 Sackton et al., 2019; Sayol et al., 2020). The large amount of energy required for flight has  
164 necessitated a high metabolic rate in birds (Holmes and Austad, 1995). Increased ATP  
165 generation fulfills these energy demands through metabolic adaptations in the OXPHOS  
166 pathway (Das, 2006). The set of flight muscles possessed by a bird species determine several  
167 aspects of flight performance and strongly influences life history and ecology (DuBay et al.,  
168 2020). Avian flight is possible through a combination of flight muscles that consist of white  
169 (fast glycolytic), intermediate/red-pink (fast oxidative), and red (slow oxidative) muscle  
170 fibers (Barnard et al., 1982; Butler, 2016; Ogata and Yamasaki, 1997). Birds with strong  
171 flight abilities, such as long-distant migrants and small passerines, contain mostly fast  
172 oxidative fibers (Welch and Altshuler, 2009). In contrast to this, Galliformes contain mostly  
173 glycolytic fibers that only allow short bursts of activity (Dial, 2003). Hence, the OXPHOS  
174 pathway is under stronger selective constraint in non-Galliform bird species than Galliform  
175 birds due to the functional specialization of mitochondria to different muscle fibers (Picard et  
176 al., 2012).

177  
178 This study evaluates whether the protein encoded by the *COAI/MITRAC15* gene, a  
179 mitochondrial complex I translation factor with a chaperone-like role, is dispensable when  
180 the OXPHOS pathway is under relaxed selective constraints. We hypothesized that the  
181 OXPHOS pathway might have experienced reduced purifying selection in felids, rodents,  
182 marsupials, and galliform birds based on increased glycolytic muscle fibers in these species.  
183 Duplicate copies or alternative metabolic pathways compensate for gene function and decide  
184 gene dispensability (Gu et al., 2003). Hence, to evaluate our hypothesis, we aim to (1)  
185 investigate whether *COAI/MITRAC15* has any homologs that could compensate its function,  
186 (2) screen the genomes of vertebrate species to identify and track the evolutionary history of  
187 *COAI/MITRAC15* orthologs, (3) identify evidence of gene disruptive changes within the  
188 *COAI/MITRAC15* locus and (4) reconstruct the sequence of events associated with the  
189 potential erosion of the *COAI/MITRAC15* locus due to chromosomal rearrangement events at  
190 the evolutionary breakpoint region spanning the *COAI/MITRAC15* gene. We extensively

191 screened publicly available genomes and transcriptomes of more than 200 vertebrate species  
192 to establish recurrent loss of the widely conserved *COA1/MITRAC15* gene.

## 193 **2. Materials and methods**

### 194 **2.1 Finding homologs of *COA1/MITRAC15***

195 The amino acid sequence of the human *COA1/MITRAC15* gene was used as a query in PSI-  
196 BLAST (Altschul et al., 1997) against the nr database with eight iterations to identify  
197 homologs. Similarly, the human *COA1/MITRAC15* amino acid sequence was the query in the  
198 program HHblits of HHsuite (Remmert et al., 2012; Steinegger et al., 2019) with the flags "-e  
199 1e-3 -n 8 -p 20 -Z 5000 -z 1 -b 1 -B 5000 -d UniRef30\_2020\_06". The output from HHblits  
200 was used as input to the CLANS program (Frickey and Lupas, 2004) with an e-value cut-off  
201 of 1e-4 to cluster the blast hits using the MPI Bioinformatics Toolkit (Gabler et al., 2020;  
202 Zimmermann et al., 2018). We ran the CLANS java application for more than 50,000 rounds  
203 on the webserver output to ensure stable clusters. Manually inspection of gene annotations  
204 allowed identification of each of the groups. Subsequently, we performed the HHblits search  
205 again with different settings such as "-glob" to perform global alignments and "-loc" to  
206 conduct local alignments. The PFAM database was the alternative to the Uniclust 30  
207 database. Manually curated multiple sequence alignment of *COA1/MITRAC15* open reading  
208 frames from 24 primate species was also separately used to query for better sensitivity. The  
209 protein *TIMM21* provides a consistent hit with different search settings and databases.

210 To further verify whether the database matches are homologous, we evaluated the biological  
211 function, secondary structure similarity, relationship among top hits, and occurrence of  
212 conserved motifs. To obtain secondary structure predictions for the proteins  
213 *COA1/MITRAC15* and *TIMM21*, we used the PROTEUS2 webserver (Montgomerie et al.,  
214 2008). The HeliQuest webserver (Gautier et al., 2008) provided each predicted helix's  
215 physicochemical properties and amino acid compositions. While the three-dimensional (3-D)  
216 structure of the *COA1/MITRAC15* protein is not available yet, multiple structures of the  
217 *TIMM21* protein are available in the Protein Data Bank (PDB). It is possible to use  
218 comparative/homology modeling to predict the 3-D structure based on the protein structure of  
219 a related protein (Webb and Sali, 2016). Hence, we used the comparative modeling approach  
220 implemented in Modeller (v10.0) software to model the structure of *COA1/MITRAC15* based  
221 on the homologous structures available in PDB. The Phyre2 (Kelley et al., 2015) and Expasy  
222 Swiss-Model (Waterhouse et al., 2018) webserver also predicted homologous 3-D structures  
223 of *COA1/MITRAC15*. All the top hits were from 3-D structures of the IMS (Inter Membrane  
224 Space) domain of *TIMM21* protein. The IMS domain of *TIMM21*, whose 3-D structures are  
225 available on PDB, contains only the part of the protein that occurs after the membrane-  
226 spanning helix. To model the structure of *COA1/MITRAC15* using these existing 3-D  
227 structures, we used the *COA1/MITRAC15* amino acid sequence that occurs after the  
228 membrane-spanning domain. We visualized the structure of *TIMM21* and the predicted  
229 *COA1/MITRAC15* structure using (UCSF Chimera v1.15) ChimeraX (Pettersen et al., 2021).

### 230 **2.2 Validation of *COA1/MITRAC15* annotation**

231 Despite being a fast-evolving gene, orthologs of *COA1/MITRAC15* can be identified based on  
232 gene synteny and sequence identity. However, identifying *COA1/MITRAC15* orthologs  
233 between distantly related species is challenging (Szklarczyk et al., 2012). We screened the  
234 genome assemblies and annotations available on NCBI and Ensembl for *COA1* (C7orf44 or  
235 *MITRAC15*) protein-coding transcripts. The *COA1/MITRAC15* gene orthologs have been  
236 annotated in almost 300 vertebrate species (see **Supplementary Table S1**). However, the  
237 number of exons and the length of the ORF is highly variable between species. We validated  
238 the annotation of the *COA1/MITRAC15* gene relying upon gene synteny in the genomic  
239 vicinity of the *COA1/MITRAC15* gene, multiple sequence alignments, and RNA-seq data.  
240 Annotation across most species endorses the existence of four coding exons that produce a  
241 ~130 to 140 amino acid (aa) protein. The *COA1/MITRAC15* annotation in the human genome  
242 (see **Supplementary Figure S1**) has multiple isoforms with seven exons. The additional  
243 three exons annotated in the human genome upstream from the widely conserved four exons  
244 need further investigation. Bird species such as *Nipponia nippon*, *Cuculus canorus*, *Pterocles*  
245 *gutturalis*, *Gavia stellate*, *Buceros rhinoceros silvestris*, *Anser cygnoides domesticus*, *Anas*  
246 *platyrhynchos* (corrected in XM\_027451320.2), and *Fulmarus glacialis* have annotation for a  
247 fifth exon upstream from the widely conserved four exons. Annotation for multiple isoforms  
248 of the *COA1/MITRAC15* gene also exists in *Athene cunicularia*, *Tyto alba*, *Calidris pugnax*,  
249 *Serinus canaria*, *Corvus moneduloides*, *Corvus brachyrhynchos*, *Egretta garzetta*, *Aquila*  
250 *chrysaetos*, *Pipra filicauda*, *Corvus cornix*, *Cygnus atratus*, and *Parus major*. We examined  
251 RNA-seq datasets of multiple species to evaluate the expression of the isoforms. RNA-seq  
252 data in *Colius striatus* and *Eurypyga helias* (which had partial sequences annotated) allowed  
253 reconstruction of full-length ORFs. In addition to bird genomes, the *COA1/MITRAC15* gene  
254 ortholog is annotated in lizards (*Zootoca vivipara*, *Podarcis muralis*, *Lacerta agilis*, *Anolis*  
255 *carolinensis*, *Gekko japonicus*, *Thamnophis sirtalis*, *Pantherophis guttatus*, *Notechis*  
256 *scutatus*, *Pseudonaja textilis* and *Python bivittatus*), turtles (*Trachemys scripta elegans*,  
257 *Chelonia mydas*, *Chelonoidis abingdonii*, *Chrysemys picta*, *Gopherus evgoodei* and  
258 *Pelodiscus sinensis*), alligators (*Gavialis gangeticus*, *Alligator sinensis*, *Alligator*  
259 *mississippiensis* and *Crocodylus porosus*), Even-toed ungulates (*Bos taurus*, *Sus scrofa*,  
260 *Odocoileus virginianus texanus*, *Bison bison bison*, *Bos indicus x Bos taurus*, *Bos mutus*,  
261 *Bubalus bubalis*, *Capra hircus*, *Ovis aries*, *Vicugna pacos*, *Camelus ferus*, *Camelus*  
262 *bactrianus*, *Camelus dromedarius*, *Neophocaena asiaorientalis asiaorientalis*,  
263 *Balaenoptera acutorostrata scammoni*, *Lipotes vexillifer*, *Lagenorhynchus obliquidens*,  
264 *Globicephala melas*, *Orcinus orca*, *Tursiops truncatus*, *Phocoena sinus*, *Monodon*  
265 *monoceros*, *Delphinapterus leucas*, *Physeter catodon* and *Balaenoptera musculus*), Odd-toed  
266 ungulates (*Equus caballus*, *Equus asinus*, *Equus przewalskii* and *Ceratotherium simum*  
267 *simum*), Pangolins (*Manis pentadactyla* and *Manis javanica*), *Galeopterus variegatus*, *Tupaia*  
268 *chinensis* and Primates (*Homo sapiens*, *Macaca mulatta*, *Pan troglodytes*, *Chlorocebus*  
269 *sabaeus*, *Callithrix jacchus*, *Colobus angolensis palliatus*, *Cercocebus atys*, *Macaca*  
270 *fascicularis*, *Macaca nemestrina*, *Papio anubis*, *Theropithecus gelada*, *Mandrillus*  
271 *leucophaeus*, *Trachypithecus francoisi*, *Rhinopithecus bieti*, *Rhinopithecus roxellana*,  
272 *Ptilocolobus tephrosceles*, *Gorilla gorilla*, *Pan paniscus*, *Pongo abelii*, *Nomascus*  
273 *leucogenys*, *Hylobates moloch*, *Saimiri boliviensis*, *Sapajus apella*, *Cebus imitator*, *Aotus*

274 *nancymae*, *Carlito syrichta*, *Propithecus coquereli*, *Microcebus murinus* and *Otolemur*  
275 *garnettii*).

276 We screened the synteny pattern of the candidate *COA1/MITRAC15* gene in Galliformes and  
277 Anseriformes using five upstream genes (*STK17A*, *HECW1*, *TNS3*, *PSMA2*, *MRPL32*) and  
278 the five downstream genes (*BLVRA*, *VOPPI*, *LANCL2*, *EGFR*, *SEC61G*). The chicken  
279 (*Gallus gallus*) has a chromosome level assembly, and the gene occurs on Chromosome 2,  
280 and its region is syntenic with human (*Homo sapiens*) chromosome 2 (**Supplementary**  
281 **Figure S2-S3**). The gene synteny is mostly conserved in these species and is present on the  
282 same scaffold/chromosome. The blast search of the genome using the query gene sequence of  
283 closely related species identified genes missing in the annotation. *Anas platyrhynchos* has  
284 chromosome level assembly with the same gene order as *Gallus gallus* (**Supplementary**  
285 **Figure S4**). *Anser cygnoides* and *Anseranas semipalmata* also contain this conserved gene  
286 order. *Anas platyrhynchos*, *Numida meleagris*, *Coturnix japonica*, *Meleagris gallopavo* show  
287 syntenic blocks aligning with the human chromosome 7 (**Supplementary Figure S5-S8**).  
288 Synteny-based verification was done clade-wise in birds (see **Supplementary Table S2**),  
289 rodents (**Supplementary Table S3**), carnivores (**Supplementary Table S4**), and primates  
290 (**Supplementary Table S5**). Gene order and synteny relationships for representative species  
291 from each of the clades are in **Supplementary Figure S9-S230**.

292 Vertebrate species have a conserved *COA1/MITRAC15* gene intron/exon organizational  
293 structure. However, two lineages (primates and carnivores) with evidence of intron/exon  
294 organization changes have also had *COA1/MITRAC15* gene duplication events. To ensure  
295 that the observed differences were not a result of incorrect annotation, alignment artifacts, or  
296 duplicated copies, we compared the *COA1/MITRAC15* gene organization across diverse  
297 vertebrate species. Subsequently, we validated the annotations from NCBI and Ensembl  
298 using RNA-seq datasets. Sequencing read haplotypes from the functional and pseudogenised  
299 copy can be distinguished as their sequences have diverged.

### 300 **2.3 Verification of *COA1/MITRAC15* gene disrupting changes in raw read data**

301 We used a previously published 5-pass strategy to verify gene loss events (S. Sharma et al.,  
302 2020). Briefly, to verify the correctness of the genome assembly nucleotide sequence, we  
303 used the *COA1/MITRAC15* gene sequence of multiple species as a query for a blastn search  
304 of the raw short-read database. The details of short-read datasets (both DNA and RNA) used  
305 to validate gene sequence are in **Supplementary Table S6**. Manual inspection of the blast  
306 search results ensured concordance between gene sequence and raw read data. All the blast  
307 output files are in **Supplementary File S1**. In the chicken genome, we also verified the  
308 correctness of genome assembly in the vicinity of the *COA1/MITRAC15* gene by evaluating  
309 Pacbio long-read data (see **Supplementary Figure S231-S234**).

### 310 **2.4 Assessing the transcriptional status of *COA1/MITRAC15***

311 We analyzed transcriptomic datasets for evidence of transcription of *COA1/MITRAC15* locus.  
312 The RNA-seq reads were mapped to the genome assemblies using the STAR read mapper  
313 (Dobin et al., 2013). We visualized the resulting bam files using the IGV browser (Robinson



314 et al., 2011; Thorvaldsdottir et al., 2013). For consistent representation across tissues and  
315 species, we used three different views: (1) Positions of all four exons of *COAI/MITRAC15*  
316 identified using blast search are shown as a bed record below the RNA-seq bam files, (2)  
317 Zoomed-in views of each of the four exons are presented in four panels within a single  
318 screenshot and (3) Zoomed-in view of the first and last exons of *COAI/MITRAC15* are shown  
319 along with the adjacent genes on both sides. The adjacent genes in the IGV screenshot act as  
320 positive controls.

321 No evidence for transcription of *COAI/MITRAC15* gene in chicken exists in the RNA-seq  
322 data from 23 tissues consisting of blood, bone marrow, breast muscle, bursa, cerebellum,  
323 cerebrum, comb, eye, fascia, gallbladder, gizzard, gonad, heart, immature egg, kidney, liver,  
324 lung, mature egg, pancreas, shank, skin, spleen, uterus (**Supplementary Figure S235-S304**).  
325 Among other Galliformes species, we found no evidence for expression of the  
326 *COAI/MITRAC15* gene. (The spleen and gonad of the peacock, the skin of golden pheasant,  
327 gonad, spleen, brain, muscle, liver, and heart of ring-necked pheasant, bursa, gonad spleen,  
328 blood and uterus of helmeted guineafowl, breast muscle, gonad, spleen, brain, liver, heart,  
329 and bursa of turkey, kidney, liver, muscle, lung, and heart of Japanese quail, the blood of  
330 *Colinus virginianus* and blood of *Syrnaticus Mikado*, see **Supplementary Figure S305-**  
331 **S373**). The only Galliform species to have a transcribed *COAI/MITRAC15* gene was  
332 *Alectura lathamii* (blood tissue: **Supplementary Figure S374-S376**).

333 In contrast to Galliformes, the *COAI/MITRAC15* gene is intact in Anseriformes species.  
334 However, the *COAI/MITRAC15* gene annotation in duck (*Anas platyrhynchos platyrhynchos*)  
335 contains two isoforms. The more extended isoform codes for a 265 amino acid protein and  
336 consists of five exons. The shorter isoform (139 amino acid) is orthologous to the Galliform  
337 ORF. Upon closer inspection of the first exon, only 24 of the 372 bases have RNA-seq read  
338 support (**Supplementary Figure S377**). Hence, this additional exon might be an annotation  
339 artifact or part of the untranslated region. The last four annotated exons, which correspond to  
340 the intact 139 amino acid encoding sequence, were found to be robustly expressed in the  
341 gonad, spleen, liver, brain, and skin (**Supplementary figure S378-S385**). A similar  
342 annotation of the fifth exon in *Anser cygnoides domesticus* appears to be an artifact. The  
343 gonad, liver, and spleen express the last four exons (see **Supplementary Figure S386-S392**).  
344 The RNA-seq data from blood tissue for magpie goose (*Anseranas semipalmata*) and  
345 southern screamer (*Chauna torquata*) also supported the transcription of the  
346 *COAI/MITRAC15* gene (**Supplementary Figure S393-S396**).

347 Having verified the expression of the *COAI/MITRAC15* gene in multiple Anseriformes  
348 species, we screened additional bird RNA-seq datasets to evaluate the transcriptional activity  
349 of the intact ORF found in these species. Many other bird genomes have annotations for  
350 multiple isoforms of the *COAI/MITRAC15* gene, like the duck genomes. These isoforms  
351 range in length from 136 to 265 amino acids and 4 to 7 exons. Based on careful examination  
352 of multiple RNA-seq datasets across several closely related species and sequence homology,  
353 we found that in most cases, the four-exon transcript coding for a 139 amino acid protein was  
354 the only correct annotation. However, in some rare cases, additional exons have robust  
355 expression and require further investigation. In the Corvidae group, annotation exists for

356 transcripts of lengths 170 and 139 aa. The first exon of the longer transcript lacked  
357 expression.

358 In comparison, all four transcripts of the shorter transcript are present in the blood tissue of  
359 western Jackdaw (*Corvus monedula*) as well as gonad, brain, spleen, and liver of hooded  
360 crow (*Corvus cornix*) (**Supplementary Figure S397- S402**). The common canary (*Serinus*  
361 *canaria*) has three transcripts with 177, 154, and 139 aa (**Supplementary Figure S403-**  
362 **S404**). We checked the expression using liver and skin tissue and found support for all three  
363 transcripts. However, upon closer inspection, the transcript with 139 aa was strongly  
364 expressed, and the other two transcripts are potentially artifacts. Great tit (*Parus major*) has  
365 two transcripts of lengths 169, 139 aa. While the kidney and liver express both transcripts, the  
366 first exon has feeble expression and appears artefactual (**Supplementary Figure S405-S406**).

367 The golden eagle (*Aquila chrysaetos*) has four annotated transcripts with lengths of 219, 180,  
368 159, and 139 aa. Transcript of 219 aa length contains six exons, transcripts of length 180 aa,  
369 and 159 aa have five exons, and 139 aa transcript contains four exons. We found that exon 1  
370 showed negligible expression, and exons 2 to 6 have high expression levels. However, exon 1  
371 and 2 both have an in-frame stop codon (**Supplementary Figure S407-S411**). Hence, we  
372 consider that the 139 aa long transcript expressed in the liver and muscle is correct. Red-  
373 throated loon (*Gavia stellata*) has a single five exon transcript of length 155 aa annotated. We  
374 discovered a lack of expression in the first exon compared to the last four exons that are  
375 orthologous to the transcript of length 139 aa (**Supplementary Figure S412-S413**).

376 The ruff (*Calidris pugnax*) genome annotates three transcripts with lengths of 233, 229, and  
377 139 aa. Transcript one and two contain seven exons each, and the third transcript contains  
378 four exons. Exons 1 and 2 lack expression in the first two transcripts, and the third exon did  
379 not have any start codon explaining the transcript. The last four exons have transcripts and  
380 are orthologous to other species' *COA1/MITRAC15* gene (**Supplementary Figure S414-**  
381 **S418**). In the little egret (*Egretta garzetta*), transcripts of lengths 212 and 203 are annotated  
382 and contain five exons. We found evidence of expression of *COA1/MITRAC15* in blood  
383 tissue (**Supplementary Figure S419-S420**). Although the first exon has a lower level of  
384 expression than the last four exons, the consistent occurrence of the fifth exon across many  
385 species suggests it might be part of the untranslated region. We annotated and verified the  
386 expression of *COA1/MITRAC15* in *Phalacrocorax carbo*, *Phaethon lepturus*, *Opisthocomus*  
387 *hoazin*, *Leptosomus discolor* (**Supplementary Figure S421-S428**). *Eurypyga helias* has an  
388 unverified transcript length of 121 aa. Hence, we screened the genome and RNA-seq data and  
389 found its transcript length is 139 aa (**Supplementary Figure S429-S431**). We verified the  
390 *COA1/MITRAC15* gene expression using RNA-seq data in *Strigops habroptilus* as it had less  
391 than 100 percent RNA-seq coverage (**Supplementary Figure S432-S433**). We also  
392 examined the RNA-seq data from few other bird species to verify the *COA1/MITRAC15* gene  
393 (see **Supplementary Figure S434-S481**). Bird species share this conserved gene order  
394 (**Supplementary Figure S482**). The Anolis lizard (*Anolis carolinensis*) liver also expresses  
395 the *COA1/MITRAC15* gene (**Supplementary Figure S483-S485**).

396 RNA-seq datasets from the European rabbit (*Oryctolagus cuniculus*) heart and liver showed  
397 no evidence of transcription of *COAI/MITRAC15* (see **Supplementary Figure S486-S489**).  
398 In contrast to the rabbit, intact *COAI/MITRAC15* gene is present in the Royle's pika  
399 (*Ochotona roylei*) and Daurian pika (*Ochotona dauurica*) with blood RNA-seq datasets  
400 showing robust expression (see **Supplementary Figure S490**). Screening of RNA-seq  
401 datasets from the root ganglion, spinal cord, ovary, liver, spleen, and testis in the naked mole-  
402 rat (*Heterocephalus glaber*) revealed no transcription of *COAI/MITRAC15* locus (see  
403 **Supplementary Figure S491**). The closely related Damaraland mole-rat (*Fukomys*  
404 *damarensis*) has robust *COAI/MITRAC15* expression in the brain, liver, and testis (see  
405 **Supplementary Figure S492-S497**). The Brazilian guinea pig (*Cavia aperea*), the guinea pig  
406 (*Cavia porcellus*), and the long-tailed chinchilla (*Chinchilla lanigera*) were all found to  
407 express the *COAI/MITRAC15* gene robustly (see **Supplementary Figure S498-S505**). The  
408 thirteen-lined ground squirrel (*Ictidomys tridecemlineatus*), the Arctic ground squirrel  
409 (*Urocitellus parryii*), the groundhog (*Marmota monax*), and the Himalayan marmot  
410 (*Marmota himalayana*) do not express the *COAI/MITRAC15* locus (see **Supplementary**  
411 **Figure S506-S520**). In contrast to these species, the Eurasian red squirrel (*Sciurus vulgaris*)  
412 has an intact *COAI/MITRAC15* expressed in the skin (see **Supplementary Figure S521-**  
413 **S522**). Despite gene disrupting mutations, the North American beaver (*Castor canadensis*)  
414 *COAI/MITRAC15* locus is expressed in the blood and spleen (see **Supplementary Figure**  
415 **S523-S524**). Other tissues such as the brain, liver, stomach, ovarian follicle, skeletal muscle,  
416 and kidney do not show any expression at the *COAI/MITRAC15* locus (see **Supplementary**  
417 **Figure S525-S530**). The expressed transcript might represent a new long non-coding RNA  
418 that cannot produce a functional *COAI/MITRAC15* protein due to the presence of premature  
419 stop codons.

420 Chromosomal rearrangement in rodent species has resulted in the movement of genes  
421 flanking *COAI/MITRAC15* to new locations. The *BLVRA* gene is transcriptionally active in  
422 the mouse (*Mus musculus*) liver and heart even though it has translocated to an entirely  
423 different location between *AP4E1* and *NCAPH* (see **Supplementary Figure S531**). Genes on  
424 the left flank consisting of *HECW1*, *PSMA2*, and *MRPL32* are now located beside *ARID4B*  
425 and are expressed in the mouse (see **Supplementary Figure S532-S533**). The genes from the  
426 right flank (*MRPS24* and *URGCP*) are also transcriptionally active in the mouse at their new  
427 location beside *ANKRD36* (see **Supplementary Figure S534**). Remnants of  
428 *COAI/MITRAC15* occur between the *PTPRF* and *HYI* genes. However, no transcriptionally  
429 activity is seen in the mouse in the region between *PTPRF* and *HYI* genes (see  
430 **Supplementary Figure S535**). The new gene order and gene expression patterns are shared  
431 by rat (*Rattus norvegicus*) (see **Supplementary Figure S536-S540**), steppe mouse (*Mus*  
432 *spicilegus*) (see **Supplementary Figure S541-S545**), Gairdner's shrewmouse (*Mus pahari*)  
433 (see **Supplementary Figure S546-S550**), Ryukyu mouse (*Mus caroli*) (see **Supplementary**  
434 **Figure S551-S555**), Algerian mouse (*Mus spretus*) (see **Supplementary Figure S556-S560**),  
435 deer mouse (*Peromyscus maniculatus*) (see **Supplementary Figure S561-S565**), prairie vole  
436 (*Microtus ochrogaster*) (see **Supplementary Figure S566-S570**), golden hamster  
437 (*Mesocricetus auratus*) (see **Supplementary Figure S571-S575**), Mongolian gerbil or  
438 Mongolian jird (*Meriones unguiculatus*) (see **Supplementary Figure S576-S579**), Chinese

439 hamster (*Cricetulus griseus*) (see **Supplementary Figure S580-S584**), Northern Israeli blind  
440 subterranean mole rat (*Nannospalax galili*) (see **Supplementary Figure S585-S589**), white-  
441 footed mouse (*Peromyscus leucopus*) (see **Supplementary Figure S590-S594**) and fat sand  
442 rat (*Psammomys obesus*) (see **Supplementary Figure S595-S599**). The banner-tailed  
443 kangaroo rat (*Dipodomys spectabilis*) (see **Supplementary Figure S600-S601**) has a  
444 different gene order and appears to represent one of the pre-EBR species. However, we  
445 cannot rule out the possibility of genome assembly errors.

446 The genome assemblies of rodents such as the mouse and rat are well-curated and represent  
447 some of the highest-quality reference genomes (Rhie et al., 2021). To ensure that the  
448 chromosomal rearrangements identified are correct, we evaluated the correctness of genome  
449 assemblies of the mouse (see **Supplementary Figure S602-S608**) and white-footed mouse  
450 (*Peromyscus leucopus*) (see **Supplementary Figure S609-S616**) using PacBio long-read  
451 sequencing datasets. The mouse genome assembly has been finished to a very high quality  
452 using artificial clones of genome fragments (Osoegawa et al., 2000). We further verified the  
453 mouse genome assembly by visualizing the coverage of assembly fragments across the  
454 genomic regions of interest (see **Supplementary Figure S618-S623**). Repeat regions occur at  
455 the boundaries of the evolutionary breakpoint regions (see the last row of screenshots).  
456 Although repeat regions are a major contributing factor for the misassembly of genomes, the  
457 conserved gene orders across several species and concordance in the timing of the  
458 chromosomal rearrangement and support from long-read data support the presence of a  
459 genuine change in gene order.

460 The *COA1/MITRAC15* gene is intact and robustly expressed in the platypus  
461 (*Ornithorhynchus anatinus*) heart and brain (see **Supplementary Figure S624-S627**). Gene  
462 order in the short-beaked echidna (*Tachyglossus aculeatus*) matches the platypus and other  
463 outgroup species (see **Supplementary Figure S628**). In contrast to the monotreme species,  
464 all marsupial genomes analyzed have a different gene order following chromosomal  
465 rearrangements. The gray short-tailed opossum (*Monodelphis domestica*) has the gene  
466 *ACVR2B* beside the new location of right flank genes of *COA1/MITRAC15*. The left flank  
467 genes are beside *GPRI41B*. No traces of the *COA1/MITRAC15* gene are found either in the  
468 genome assembly or raw read datasets. The opossum brain expresses these adjacent genes  
469 with no transcripts in the intergenic regions (see **Supplementary Figure S629-S631**). The  
470 gene order and transcriptional activity were the same in the tammar wallaby (*Notamacropus*  
471 *eugenii*) (Uterus: see **Supplementary Figure S632-S633**), koala (*Phascolarctos cinereus*)  
472 (Liver and PBMC: see **Supplementary Figure S634-S636**), the Tasmanian devil  
473 (*Sarcophilus harrisii*) (Lung and Spleen: see **Supplementary Figure S637-S639**), and the  
474 common brushtail (*Trichosurus vulpecula*) (Liver: see **Supplementary Figure S640-S642**).  
475 Long-read sequencing data in the koala supports the correctness of genome assembly (see  
476 **Supplementary Figure S643-S645**).

477 The NCBI annotation documents the presence of transcripts, and the *COA1/MITRAC15* gene  
478 is remarkably well conserved in ungulate species (see **Supplementary Table S1**). Within  
479 ungulate species, certain Cervid species have remarkable sprinting abilities that allow them to  
480 escape from predators. However, in addition to sprinting ability, these species are resistant to

481 fatigue. Hence, the prediction from our hypothesis is that gene loss would not occur in Cervid  
482 species. The white-tailed deer (*Odocoileus virginianus*) liver and retropharyngeal lymph node  
483 and the red deer (*Cervus elaphus*) blood transcriptomes express *COAI/MITRAC15* (see  
484 **Supplementary Figure S646-S649**).

485 The *COAI/MITRAC15* gene has undergone duplication within the primate lineage. We  
486 screened the genomes of 27 primate species to track down when the gene duplication event  
487 occurred. Based on the presence of the duplicate copies, the duplication event is estimated to  
488 have happened in the last 43 million years (see **Supplementary Figure S650-S651**).  
489 Subsequent duplications have also occurred in Nancy Ma's night monkey (*Aotus nancymaae*)  
490 and a shared duplication in the black-capped squirrel monkey (*Saimiri boliviensis*) and the  
491 Panamanian white-faced capuchin (*Cebus imitator*). Concurrent with the gene duplication,  
492 the intron-exon structure of the *COAI/MITRAC15* gene has also changed (see  
493 **Supplementary Figure S652**). The functional copy of the *COAI/MITRAC15* gene is  
494 transcriptionally active in the gray mouse lemur (*Microcebus murinus*) (Kidney and Lung:  
495 see **Supplementary Figure S653-S654**), the northern greater galago (*Otolemur garnettii*)  
496 (Liver: see **Supplementary Figure S655**), Coquerel's sifaka (*Propithecus coquereli*) (see  
497 **Supplementary Figure S656**), Nancy Ma's night monkey (*Aotus nancymaae*) (Liver, Heart,  
498 and Kidney: see **Supplementary Figure S657-S659**), the common marmoset (*Callithrix*  
499 *jacchus*) (Lung, Liver, and Kidney: see **Supplementary Figure S660-S661**), the Panamanian  
500 white-faced capuchin (*Cebus imitator*) (Blood: see **Supplementary Figure S662-S664**), the  
501 black-capped squirrel monkey (*Saimiri boliviensis*) (Ovary and Heart: see **Supplementary**  
502 **Figure S665-S668**), the sooty mangabey (*Cercocebus atys*) (Liver: see **Supplementary**  
503 **Figure S669-S670**), the olive baboon (*Papio anubis*) (Kidney and Heart: see **Supplementary**  
504 **Figure S671-672**), the crab-eating macaque (*Macaca fascicularis*) (Blood and Liver: see  
505 **Supplementary Figure S673-S674**), the golden snub-nosed monkey (*Rhinopithecus*  
506 *roxellana*) (Heart and Blood: see **Supplementary Figure S675-S676**), human (*Homo*  
507 *sapiens*) (Liver : see **Supplementary Figure S677-S682**) and the Philippine tarsier (*Carlito*  
508 *syrichta*) (see **Supplementary Figure S683**).

509 The intron/exon structure of the *COAI/MITRAC15* gene has undergone several changes in the  
510 carnivore lineage (see **Supplementary Figure S684-S685**). However, outgroup species such  
511 as the horse (*Equus caballus*) and pangolin (*Manis javanica*) lack intron/exon structure (see  
512 **Supplementary Figure S686-S687**). We screened the RNA-seq dataset of multiple carnivore  
513 species to validate the annotation and evaluate the intron/exon structure changes. Alternative  
514 exon usage was also carefully analyzed to quantify the transcriptional status of  
515 *COAI/MITRAC15* in different carnivore species. The *COAI/MITRAC15* gene is  
516 transcriptionally active in the meerkat (*Suricata suricatta*) (testis and liver: see  
517 **Supplementary Figure S688-S690**), dog (*Canis lupus familiaris*) (spleen and skeletal  
518 muscle: see **Supplementary Figure S691-S702**), ferret (*Mustela putorius furo*) (heart and  
519 kidney: see **Supplementary Figure S703-S704**), Giant panda (*Ailuropoda melanoleuca*)  
520 (heart and liver: see **Supplementary Figure S705-S706**), American black bear (*Ursus*  
521 *americanus*) (liver, kidney, and the brain: see **Supplementary Figure S707-S708**), and  
522 Weddell seal (*Leptonychotes weddellii*) (lung and muscle: see **Supplementary Figure S709-**

523 **S712**). Detailed investigation of the splice junctions and actual positions of splice sites in dog  
524 transcriptome also supports the *COA1/MITRAC15* gene annotation.

525 Skipping of the dog-like-exon-3 occurs in the transcriptomes of tiger (*Panthera tigris*  
526 *altaica*), lion (*Panthera leo persica*), cat (*Felis catus*), and puma (*Puma concolor*) (see  
527 **Supplementary Figure S713-S738**). Although annotation for the *COA1/MITRAC15* locus  
528 exists in the cheetah (*Acinonyx jubatus*), we found no transcripts in the skin RNA-seq data  
529 (see **Supplementary Figure S739-S740**). Close inspection of the *COA1/MITRAC15* locus in  
530 cheetah suggests gene loss. We further compared the splice isoforms found in canine and  
531 felid species through sashimi plots of the *COA1/MITRAC15* locus. The sashimi plot shows  
532 the links between the splice sites and the number of reads that are splice mapped between  
533 these sites (see **Supplementary Figure S741-S745**). Changes in the splice enhancers and  
534 splice silencer elements were also compared between cat and dog (see **Supplementary**  
535 **Figure S746**).

536 Co-expressed genes tend to perform related functions and are lost together. Hence, to identify  
537 the loss of genes related to *COA1/MITRAC15*, we identified the top 50 genes co-expressed  
538 with human ortholog based on the correlation values in COXPRESdb ver. 7.3 (Obayashi et  
539 al., 2019). The presence of orthologs of these co-expressed genes in the high-quality genomes  
540 of chicken and mouse using ENSEMBL BioMart (**Supplementary Table S7**). None of these  
541 co-expressed genes appear lost in Galliformes or rodents.

542

## 543 **2.5 Molecular evolutionary analyses**

### 544 2.5.1 Relaxed selection signatures

545 Molecular signatures of relaxation in the degree of purifying selection generally accompany  
546 the loss of gene functionality and have been used as evidence of gene loss (Hecker et al.,  
547 2017; Sharma and Hiller, 2018; Shinde et al., 2019). Based on the gene sequence of  
548 *COA1/MITRAC15*, we could identify eleven Galliform species with gene-disrupting  
549 mutations (see **Supplementary Table S8** and **S9**). Two other Galliform species  
550 (*Chrysolophus pictus* and *Phasianus colchicus*) do not express the *COA1/MITRAC15* gene.  
551 Hence, we looked for signatures of relaxed selection in each of the terminal branches leading  
552 to each Galliform species. We quantified branch-specific selection patterns using the program  
553 RELAX (Wertheim et al., 2015) from the HyPhy package and the codeml program from the  
554 PAML (Yang, 2007) package. To test for relaxed selection in the terminal branches, we  
555 labeled the focal species as the foreground and used the Anseriformes species as the  
556 background species. We downloaded the phylogenetic tree with branch lengths from the  
557 TimeTree website. Although we found some evidence of relaxed selection in some of the  
558 Galliform species, the RELAX program also reported intensification of selection (see  
559 **Supplementary Table S10**). None of the internal branches were under relaxed selection.

560 We used the same phylogenetic tree and multiple sequence alignment to obtain branch-  
561 specific estimates of  $\omega$  using the codeml program. The branch-specific estimates of  $\omega$  are all  
562 greater than 1 in *Odontophorus gujanensis*, *Coturnix japonica*, *Meleagris gallopavo*,

563 *Tympanuchus cupido*, *Pavo cristatus*, *Chrysolophus pictus*, *Phasianus colchicus*, and *Numida*  
564 *meleagris*. In the case of Galliform species (*Alectura lathami*, *Callipepla squamata*, and  
565 *Penelope pileata*) with intact *COAI/MITRAC15* gene, the values of  $\omega$  are all less than 1.  
566 Except for chicken (*Gallus gallus*), species with gene-disrupting changes are not under  
567 purifying selection (see **Supplementary Table S10** and **S11**). We evaluated the internal  
568 nodes leading to the terminal branches for signatures of relaxed selection to ascertain whether  
569 gene loss had occurred in the common ancestor of the Galliform species with gene-disrupting  
570 mutations. However, all the ancestral branches appear to be under purifying selection and  
571 support the idea of recurrent lineage-specific gene loss suggested by the lineage-specific gene  
572 disrupting mutations seen in the Galliform species. Based on this branch-by-branch analysis  
573 of selection signatures, we could identify the approximate time frame in which gene loss  
574 might have occurred. To get a more accurate estimate of the gene loss timing, we used the  
575 method described by (Meredith et al., 2009).

576 We relied upon multiple sequence alignments of carnivores (see **Supplementary Table S12**),  
577 rodents (see **Supplementary Table S13**), and primates (see **Supplementary Table S14**) to  
578 identify gene disrupting mutations and changes in intron-exon structure. We evaluated each  
579 taxonomic group for lineage-specific relaxed selection (see **Supplementary Table S15**).  
580 Based on previous reports (Van Der Lee et al., 2017) of positive selection in primates, we  
581 additionally identified positively selected sites among primate species (see **Supplementary**  
582 **Table S16**).

### 583 2.5.2 Time of gene loss

584 Different  $\omega$  values were estimated for both of these labels (see **Supplementary Table S17**).  
585 The  $\omega$  values for mixed( $\omega_m$ ) and functional( $\omega_p$ ) branches were estimated using two different  
586 codon substitution models (F1X4 and F3X4) to ensure the robustness of the estimates. The  
587 calculation of gene loss timing relies upon estimates of  $T_p$  (time for which the gene has been  
588 pseudogenic) using the method proposed by Meredith et al. (2009) by considering  $\omega_p$  as 1.  
589 Based on the assumptions of 1ds and 2ds, we could get a confidence interval for the  
590 estimated time of gene loss (see **Supplementary Table S17**). Gene loss timing was estimated  
591 separately in rodents and carnivores (see **Supplementary Table S17**).

### 592 2.5.3 GC content range and kmer abundance

593 The GC content range (minimum and maximum possible values of GC% for a given amino  
594 acid sequence) was calculated (see **Supplementary Table S18**) for *COAI/MITRAC15* and  
595 *PDX1* amino acid sequences in rodent and primate species using the window-based tool  
596 CodSeqGen (Al-Ssulami et al., 2020). The ContMap function in the R package phytools  
597 extrapolates the evolution of GC content along the phylogeny for both genes (see  
598 **Supplementary Figure S747-S749**). The program jellyfish (v2.2.8) (Marçais and Kingsford,  
599 2011) was used to get the kmers (count command with the flags -C -m 21 -s 1000M and -t  
600 16) and their abundance (dump command). The seqkit fx2tab (v0.10.1) (Shen et al., 2016)  
601 option calculated the abundance of kmers at different GC content bins and the GC content of  
602 each of the *COAI/MITRAC15* gene exons (see **Supplementary Table S19**).

#### 603 2.5.4 Quantification of gBGC

604 We calculated the (gBGC) for *COA1/MITRAC15* gene sequences of more than 200 species  
605 using the program mapNH(v1.3.0) implemented in the testNH package (Dutheil, 2008). In  
606 mapNH, we used multiple sequence alignments of the *COA1/MITRAC15* gene and species  
607 tree as input with the flag model=K80. A single gene-wide estimate of gBGC termed GC\* is  
608 obtained for each species (see **Supplementary Table S20**). These estimates of GC\* (GC\* >  
609 0.9 is significant) help understand the evolution of gBGC along the phylogeny using the  
610 ContMap function of the phytools package. Additionally, we also calculated the gBGC for  
611 taxonomic group-wise alignments using the programs phastBias and phyloFit implemented in  
612 the PHAST (v1.3) package (Capra et al., 2013; Hubisz et al., 2011). In the first step, we use  
613 the phyloFit program to fit phylogenetic models to multiple sequence alignments using the  
614 specified tree topology (--tree flag with species tree as argument) and substitution model (--  
615 subst-mod flag with HKY85 model as argument). Next, the phastBias program with the -bgc  
616 flag identified gBGC tracts using the ".mod" file output from phyloFit (see **Supplementary**  
617 **Table S21**, see **Supplementary Figure S750-S778**). The gBGC tracts are positions along the  
618 gene with posterior probability >0.5.

#### 619 2.5.5 Computational prediction of RNA binding sites

620 The regulation of gene expression and splicing tends to be determined by the RNA binding  
621 sites present within the exons or introns of a gene (Fu and Ares, 2014). A combination of  
622 such splice enhancers and splice silencer elements work in concert to facilitate the expression  
623 of different isoforms (Dassi, 2017). The *COA1/MITRAC15* gene has changed the intron-exon  
624 organization and has acquired novel splice isoforms in felid species. These changes in  
625 splicing could result from changes in the RNA binding motifs present within the exons or  
626 introns of the gene. In contrast to felids, the splicing pattern in canid species matches the  
627 ancestral state. Hence, we compared the *COA1/MITRAC15* gene sequences of canid and felid  
628 species to identify differences in the RNA binding motifs. We used the RBPmap (Paz et al.,  
629 2014) webserver to predict the RNA binding sites in each exon and intron separately (see  
630 **Supplementary Table S22**).

### 631 **3. Results**

#### 632 **3.1 *COA1/MITRAC15* is a distant homolog of *TIMM21***

633 We identified that the *TIMM21* gene is a distant homolog of *COA1/MITRAC15* based on PSI-  
634 Blast and HHblits iterative profile-profile search of the uniprot database. Of the 500 top  
635 search results from HHblits, 59 have annotation as "Cytochrome C oxidase assembly factor"  
636 or "Cytochrome C oxidase assembly protein" or "*COA1*", and 120 as "*TIMM21*" homologs.  
637 The annotation of 13 proteins are "hypothetical", nine are "membrane" proteins, eight are  
638 "DUF1783 domain-containing" proteins, and 27 proteins are from diverse proteins. The  
639 remaining 264 of the 500 hits are "Uncharacterized". The large number of "Uncharacterized"  
640 proteins identified are challenging to interpret. Hence, to trace the relationships between the  
641 proteins identified as homologs of *COA1/MITRAC15*, we investigated the sequence identity-  
642 based clusters established by CLANS (see **Fig. 1A**). The large group of red dots consists of



643 proteins annotated as *TIMM21*, and the collection of blue dots contains proteins annotated as  
644 *COA1/MITRAC15*. Homologs of *COA1/MITRAC15* from bacterial species form two clusters,  
645 a distinct light blue cluster consisting of predominantly Planctomycetes bacteria and a diffuse  
646 bunch of brown dots that consists of largely proteobacterial species. The group of orange dots  
647 consists of proteins annotated as *COA1/MITRAC15* in fungal genomes. The  
648 *COA1/MITRAC15* homologs in plants consist of a yellow cluster consisting of *Arabidopsis*  
649 *thaliana* homolog At2g20390 and the magenta cluster of *TIMM21*-like proteins containing  
650 *Arabidopsis thaliana* homolog At2g37940. The distinct *COA1/MITRAC15* and *TIMM21*  
651 groups found by the cluster analysis suggest that *TIMM21* is a very distant homolog of  
652 *COA1/MITRAC15*.

653 The list of proteins identified as homologs of human *COA1/MITRAC15* (**Supplementary**  
654 **File S2-S3**) and primate *COA1/MITRAC15* orthologs (**Supplementary File S4**) contain  
655 several *TIMM21* like proteins. Iterative PSI-BLAST search identified *TIMM21* homologs  
656 from the second iteration onwards and found an increasing number of *TIMM21* hits in each  
657 subsequent iteration (see **Supplementary File S5**). The pairwise alignment of the human  
658 *COA1/MITRAC15* protein sequence with the *TIMM21* protein with the best alignment (i.e.,  
659 *TIMM21* from *Amblyomma cajennenseis*) shows that regions with the most substantial  
660 homology include the membrane-spanning domain and covers >100 residues (see **Fig. 1B**).  
661 In addition to the primary sequence-homology detected, both *TIMM21* and *COA1/MITRAC15*  
662 are known to play prominent roles in the mitochondria and have comparable secondary  
663 structures (see **Fig. 1C, 1D**). The strong homology between these proteins also allows for  
664 homology-based modeling of the tertiary structure of the *COA1/MITRAC15* protein using  
665 *TIMM21* as a model (see **Supplementary Figure S779-S783**). Despite the lack of well-  
666 conserved motifs, we found three well-matching columns (marked with a '|' sign in **Fig. 1B**)  
667 between residues 91 to 95 in *COA1/MITRAC15*. Two consecutive conserved residues occur  
668 at residues 57-58, 64-65, and 67-68 of *COA1/MITRAC15*. The similar sequence, structure,  
669 and function of *COA1/MITRAC15* and *TIMM21* strongly support that these genes are  
670 homologs.

### 671 **3.2 *COA1/MITRAC15* gene duplication, pseudogenisation, and exon reorganization**

672 The sequence divergence between *COA1/MITRAC15* and *TIMM21* appears to result from  
673 changes in the *COA1/MITRAC15* gene intron/exon organization. The *COA1/MITRAC15* gene  
674 has undergone independent gene duplications followed by pseudogenisation and degeneration  
675 of the duplicated copy in both primates and carnivores. Consequently, the functional and  
676 pseudogene copies of *COA1/MITRAC15* have diverged considerably and formed distinct  
677 haplotypes. For example, the blast search of sequencing raw read data from the human  
678 genome with *COA1/MITRAC15* gene sequence as a query results in two distinct haplotypes.  
679 One set of reads correspond to the intact *COA1/MITRAC15* gene in humans, and the other set  
680 of reads are from the pseudogenic copy (see **Fig. 2A**). Comparative analysis of primate  
681 genome assemblies suggests that the pseudogenic copy results from a duplication of  
682 *COA1/MITRAC15* within the primate lineage (see **Supplementary Figure S651**). After  
683 duplication of the *COA1/MITRAC15* gene in primates, an extension of the N-terminal region  
684 has occurred in Cercopithecidae and Catarrhini and is transcriptionally active (see

685 **Supplementary Figure S652**). However, new world monkeys do not have this N-terminal  
686 extension denoted as exon-1a. Both Cercopithecidae and Catarrhini have an additional start  
687 codon in exon-1a upstream from the original start codon in the ancestral exon-1 denoted as  
688 exon-1b in species with N-terminal extension. A striking difference between Cercopithecidae  
689 and Catarrhini is the lack of the internal start codon in Cercopithecidae, where Catarrhini has  
690 a start codon. Since proteome level data is not available for these species, we rely solely on  
691 the RNA-seq datasets and start and stop codons within the expressed transcripts to evaluate  
692 the exon/intron structure changes. Using these carefully annotated primate sequences of  
693 *COA1/MITRAC15*, we verified (see **Supplementary Table S16**) a previous report (Van Der  
694 Lee et al., 2017) of positive selection in this gene among primates.

695 Independent duplication of *COA1/MITRAC15* has occurred in carnivores (see  
696 **Supplementary Figure S685**). However, similar to primates, the duplicated copy has  
697 undergone pseudogenization and diverged from the functional gene sequence. For example,  
698 sequencing raw read data in the tiger consist of two distinct haplotypes corresponding to the  
699 intact and pseudogene copies (see **Fig. 2B**). While the intact copy is located at a genomic  
700 region (*STK17A* & *HECW1* upstream and *BLVRA* & *VOPPI* downstream) with conserved  
701 synteny across other mammals, the pseudogene copy occurs adjacent to the *PRR32* gene.  
702 Outgroup species such as horse (*Equus caballus*) and pangolin (*Manis javanica*) have a  
703 single copy of the *COA1/MITRAC15* gene with all raw reads supporting a single haplotype  
704 (see **Supplementary Figure S686**). Both sub-orders (Caniformia and Feliformia) within  
705 Carnivora share this duplication of the *COA1/MITRAC15* gene (see **Supplementary Figure**  
706 **S685**).

707 The intact *COA1/MITRAC15* copy is expressed in diverse transcriptomes among Caniformia  
708 species, while the pseudogene copy lacks expression. The first and second exons are  
709 orthologous; however, the genomic location of the transcribed third exon is different between  
710 Feliformia (cat-like-exon-3) and Caniformia species (dog-like-exon-3) (see **Fig. 3**). The final  
711 exon of the *COA1/MITRAC15* gene in Feliformia extends to 163 base pairs (*Panthera tigris*  
712 *altaica*, *Panthera leo*, *Panthera pardus*, and *Lynx lynx*) and 160 base pairs (*Puma concolor*  
713 and *Felis catus*) compared to the 100 base pairs in Caniformia species. A single deletion  
714 event causes the difference of three base pairs between these two groups of Feliformia at the  
715 24<sup>th</sup> base of exon-4. The extended final exon shared by all Feliformia species results from a  
716 two-base frameshift deletion before the erstwhile stop codon in exon-4. Despite the extended  
717 last exon in Feliformia species, the full-length open reading frames of Feliformia (130/131  
718 amino acids) and Caniformia (135 amino acids) are comparable.

719 The shorter reading frame in Feliformia results from the majority of *COA1/MITRAC15*  
720 transcripts skipping the dog-like-exon-3, whose inclusion results in premature stop codons in  
721 all the seven Feliformia species. The dog-like-exon-3 is present in all *COA1/MITRAC15*  
722 transcripts of Caniformia species and does not contain gene-disrupting changes. A single base  
723 deletion in all Feliformia species changes the end phase of exon-2 to maintain an intact  
724 reading frame while skipping the dog-like-exon-3. Transcriptomes of the cat (*Felis catus*)  
725 from the spleen (see **Supplementary Figure S744**) and puma (*Puma concolor*) from blood  
726 (see **Supplementary Figure S745**) exhibit expression of a proto cat-like-exon-3 which gets

727 spliced into some of the *COAI/MITRAC15* transcripts. However, the majority of transcripts  
728 skip this proto cat-like-exon-3 which contains premature stop codons. These changes in exon  
729 splicing patterns between Caniformia and Feliformia species appear to result from changes in  
730 splice factor binding sites at the *COAI/MITRAC15* locus (see **Supplementary Figure S746**).

731 Except for the cheetah (*Acinonyx jubatus*), intact transcribed open reading frames are  
732 discernible in all carnivore species at the *COAI/MITRAC15* locus identified based on  
733 conserved synteny across mammals (see **Fig. 3**). The gene disrupting premature stop codon in  
734 the cheetah is due to a single base C->T substitution at the 27<sup>th</sup> base of exon-2 assembled at  
735 the *COAI/MITRAC15* locus. The duplicated copy of *COAI/MITRAC15* also contains a  
736 premature stop codon at the 49<sup>th</sup> base of exon-2 caused by a single base insertion at the 11<sup>th</sup>  
737 base of exon-2. The *COAI/MITRAC15* gene transcripts are missing in the skin transcriptome  
738 of the cheetah. Hence, multiple lines of evidence support *COAI/MITRAC15* gene loss in the  
739 cheetah. Gene loss in the cheetah occurred between 2.98-3 MYA (**Supplementary Table**  
740 **S17**).

741

742 In contrast to primates and carnivores, reads support multiple haplotypes of  
743 *COAI/MITRAC15* only in the second exon of naked mole-rat (see **Fig. 2C**). Hence, the  
744 duplicated copy of *COAI/MITRAC15* in naked mole-rat appears to have mostly degraded.  
745 However, we cannot rule out the possibility that the reads from other haplotypes spanning the  
746 remaining three exons are missing due to high GC content. The sequencing reads support the  
747 presence of a single intact open reading frame in the red squirrel (see **Fig. 2D**) and platypus  
748 (see **Fig. 2E**). Although a single haplotype occurs in the raw read dataset of chicken, this  
749 haplotype has gene-disrupting changes (see **Fig. 2F**). The gene-disrupting modifications  
750 identified in the chicken *COAI/MITRAC15* gene were investigated further by screening long-  
751 read datasets, transcriptomes, and genomes of various Galliform species.

### 752 **3.3 *COAI/MITRAC15* gene loss in Galliform species**

753 We found evidence of eight independent gene-disruption events in the *COAI/MITRAC15*  
754 gene in the galliform group (see **Fig. 4A**). The chicken (*Gallus gallus*) and Amazonian wood  
755 quail (*Odontophorus gujanensis*) have single-base G to T substitutions at the 69<sup>th</sup> base of  
756 exon-2 and the 72<sup>nd</sup> base of exon-4 in the *COAI/MITRAC15* gene, respectively (see  
757 **Supplementary Table S9**). These substitutions lead to (GAA→TAA) premature stop  
758 codons. Gene loss of *COAI/MITRAC15* is estimated to have occurred between 23 MYA and  
759 29 MYA in chicken and between 17 MYA and 18 MYA in the Amazonian wood quail (see  
760 **Supplementary Table S9** and **S17**). In the Indian peafowl (*Pavo cristatus*), two single-base  
761 deletions, one at 37<sup>th</sup> base of exon-1 and another at 31<sup>st</sup> base of exon-4, result in premature  
762 stop codons in exons 2, 3, and 4. The gene disrupting mutations identified in the Indian  
763 peafowl (*Pavo cristatus*) also occur in the green peafowl (*Pavo muticus*). Loss of the  
764 *COAI/MITRAC15* gene is estimated to have occurred between 20 MYA and 29 MYA in the  
765 peafowls (see **Supplementary Table S17**). The exon-2 of Pinnated grouse (*Tympanuchus*  
766 *cupido*) and Helmeted guineafowl (*Numida Meleagris*) have independent 13 and 17 base

767 deletions. Changes in the reading frame resulting from these deletions lead to several  
768 premature stop codons (see **Supplementary Table S9**). The 13-base deletion in the exon-2 of  
769 the Pinnated Grouse (*Tympanuchus cupido*) also occurs in Gunnison grouse (*Centrocercus*  
770 *minimus*), Rock ptarmigan (*Lagopus muta*), and the black grouse (*Lyrurus tetrrix*). The  
771 estimated time of gene loss in these four species is between 18 MYA and 20 MYA, and for  
772 Helmeted guineafowl, it is between 39 MYA and 40 MYA (see **Supplementary Table S17**).

773

774 In Turkey (*Meleagris gallopavo*), a two-base substitution at bases 7 & 8 and a single base  
775 deletion at the 37<sup>th</sup> base of exon-2 result in a frameshift in the *COA1/MITRAC15* gene leading  
776 to premature stop codons. Gene loss in Turkey is estimated to have occurred between 14  
777 MYA and 18 MYA. Two closely spaced single base substitutions (**AAC**→**TAA**) at 48th and  
778 50th positions of exon-2 result in a premature stop codon in the Japanese quail (*Coturnix*  
779 *japonica*). The time of gene loss in the Japanese quail is estimated between 35 MYA and 36  
780 MYA (see **Supplementary Table S17**). The Mikado pheasant (*Syrnaticus mikado*) has an 11-  
781 base deletion in exon-4, and the time of gene loss is between 14 MYA and 16 MYA. Other  
782 Galliform species such as Australian brushturkey (*Alectura lathami*), Blue quail (*Callipepla*  
783 *squamata*), Ring-necked pheasant (*Phasianus colchicus*), Golden pheasant (*Chrysolophus*  
784 *pictus*), and White-crested guan (*Penelope pileata*) have intact *COA1/MITRAC15* coding  
785 sequences. The coding region is intact in outgroup species such as Swan goose (*Anser*  
786 *cygnoides*), Duck (*Anas platyrhynchos*), and Magpie goose (*Anseranas semipalmata*). Five  
787 genes upstream (*BLVRA*, *VOPPI1*, *LANCL2*, *EGFR*, and *SEC61G*) and downstream (*STK17A*,  
788 *HECW1*, *MRPL32*, *PSMA2*, and *C7orf25*) from *COA1/MITRAC15* retain a conserved order in  
789 birds. We relied upon this conserved order to verify the 1 to 1 orthology of the  
790 *COA1/MITRAC15* gene across species (see **Fig. 4B**).

791

792 Signatures of relaxed selection in Galliform species with gene disrupting changes further  
793 support the loss of *COA1/MITRAC15* in these lineages (see **Supplementary Table S10**).  
794 Despite intact coding regions, the Ring-necked pheasant (*Phasianus colchicus*) and Golden  
795 pheasant (*Chrysolophus pictus*) *COA1/MITRAC15* sequences also have signatures of relaxed  
796 selection (see **Supplementary Table S10**). None of the four tissues (Brain, Spleen, Liver, and  
797 Gonad) for which RNA-seq data is available from the Ring-necked pheasant shows any  
798 *COA1/MITRAC15* transcripts. Similarly, the one tissue (Skin) for which RNA-seq data is  
799 available in the Golden pheasant (*Chrysolophus pictus*) does not show *COA1/MITRAC15*  
800 expression. To evaluate the relevance of the gene disrupting mutations and signatures of  
801 relaxed selection identified in galliform species, the transcriptomes of Galloanserae species  
802 were screened to assess the transcriptional status of *COA1/MITRAC15*. We evaluated RNA-  
803 seq datasets of several comparable tissues across species and found the *COA1/MITRAC15*  
804 gene is not transcribed in chicken despite screening more than 20 tissues (see **Fig. 4C**). Other  
805 Galloanserae species have RNA-seq data available for very few tissues. We evaluated the  
806 RNA-seq datasets from six tissues (Brain, Spleen, Skin, Liver, Gonad, and Blood) available  
807 in several species for the presence of *COA1/MITRAC15* transcripts. Our search consistently  
808 revealed transcription of *COA1/MITRAC15* gene in Anseriformes species in contrast to lack

809 of transcription in Galliform species except for Australian brushturkey (*Alectura lathami*) and  
810 northern bobwhite (*Colinus virginianus*), which have intact *COA1/MITRAC15* gene that is  
811 under strong purifying selection (see **Fig. 4C**). The lack of gene expression and signatures of  
812 relaxed selection in the Ring-necked pheasant (*Phasianus colchicus*) and Golden pheasant  
813 (*Chrysolophus pictus*) suggests gene loss. The putative gene loss in both these species  
814 occurred between 12 MYA and 13 MYA.

815

### 816 **3.4 Complete erosion of *COA1/MITRAC15* locus is challenging to prove**

817 Search for the *COA1/MITRAC15* gene in the mammoth genome demonstrated striking  
818 heterogeneity in coverage of the four exons based on the Illumina ancient DNA sequencing  
819 datasets analyzed (see **Fig. 5A-F**). Despite having comparable genome-wide coverage, we  
820 could see that not all exons occur in all the datasets. For instance, the re-sequencing dataset  
821 from PRJEB29510 (162 Gb) does not have reads from any of the four *COA1/MITRAC15*  
822 exons. However, the datasets from PRJEB7929 (88.34 Gb) and PRJNA397140 (155 Gb)  
823 have reads covering three exons each despite having much lower genome-wide coverage. The  
824 third exon of *COA1/MITRAC15* was also missing or had fewer reads than the other three  
825 exons in most of the datasets. The dataset from PRJEB42269 had no reads from the first exon  
826 but had a few reads from exons three and four. We reasoned that this heterogeneity in the  
827 coverage of various *COA1/MITRAC15* exons was mainly a result of the well-established  
828 sequencing bias of Illumina that results in inadequate coverage of GC-rich regions (Chen et  
829 al., 2013). Quantification of GC content in each of the four *COA1/MITRAC15* exons and  
830 kmer abundance in different GC content bins in each of the mammoth Illumina re-sequencing  
831 datasets explains most of the heterogeneity in coverage between datasets as well as exons  
832 (see **Fig. 5G**). In contrast to the *COA1/MITRAC15* gene, we did not see heterogeneity in the  
833 sequencing coverage of *TIMM21* exons despite comparable GC content for some of the exons  
834 (see **Fig. 5G** and **Supplementary Figure S784-S791**).

835 The heterogeneity in sequencing coverage of *COA1/MITRAC15* exons demonstrates the  
836 challenges of detecting its presence in Illumina sequencing datasets. GC-biased gene  
837 conversion (gBGC) plays a defining role in the base composition for any particular gene or  
838 genomic region. It preferentially fixes GC in AT/GC heterozygotes and increases the GC  
839 content. The GC content of the *COA1/MITRAC15* exons can be driven to extreme values by  
840 gBGC. The magnitude of gBGC also varies across the genome within a species as well as  
841 between species. Therefore, *COA1/MITRAC15* orthologs from closely related species or even  
842 duplicated copies of *COA1/MITRAC15* within the same species can have very different GC  
843 content. Such differences in GC content can result in correspondingly different coverage of  
844 the gene sequence in Illumina data and masquerade as a gene loss event (Botero-Castro et al.,  
845 2017; Hargreaves et al., 2017).

846 A well-known example for high GC content impeding sequencing is the gene *PDX1*, which  
847 has striking differences in GC content between closely related rodent species and requires  
848 dedicated GC-rich DNA enrichment protocols for sequencing. We contrasted  
849 *COA1/MITRAC15* with the *PDX1* genes of rodents by comparing the minimum (see

850 **Supplementary Table S20**) and maximum (see **Supplementary Table S20**) GC contents  
851 possible given their amino acid sequence. Although *COA1/MITRAC15* had lower GC content  
852 levels than *PDX1*, we could not rule out the possibility of gBGC affecting some of the exons.  
853 The values of GC\* across more than 200 vertebrate species with intact *COA1/MITRAC15*  
854 reading frames suggested considerable heterogeneity between taxa (see **Supplementary**  
855 **Figure S749**). In each taxonomic group, the prevalence of gBGC was separately quantified  
856 (see **Supplementary Figure S750-S772**). Strong patterns of gBGC occur in the  
857 *COA1/MITRAC15* sequence of several species (see **Supplementary Figure S750-S772**:  
858 elephant (*Loxodonta africana*), kagu (*Rhynchotus jubatus*), blue-crowned manakin  
859 (*Lepidothrix coronata*), Chilean tinamou (*Nothoprocta perdicaria*), American black bear  
860 (*Ursus americanus*), North American river otter (*Lontra canadensis*), meerkat (*Suricata*  
861 *suricatta*), California sea lion (*Zalophus californianus*), little brown bat (*Myotis lucifugus*),  
862 large flying fox (*Pteropus vampyrus*), southern pig-tailed macaque (*Macaca nemestrina*),  
863 Brazilian guinea pig (*Cavia aperea*), sheep (*Ovis aries*), eastern brown snake (*Pseudonaja*  
864 *textilis*) and the Goode's thornscrub tortoise (*Gopherus evgoodei*). However, none of the  
865 rodent species with intact *COA1/MITRAC15* show any striking gBGC patterns. The GC  
866 content vs. kmer abundance plots of Pacbio, BGI-seq, and Illumina datasets spans the entire  
867 range of GC contents seen in *COA1/MITRAC15* exons (see **Supplementary Figure S775**).  
868 Since the GC content of individual *COA1/MITRAC15* exons differs between species groups  
869 (see **Supplementary Figure S775-S778**), the high GC content of certain regions might result  
870 in inadequate sequencing coverage of the *COA1/MITRAC15* gene in some species. Hence, the  
871 lack of sequencing reads covering *COA1/MITRAC15* cannot serve as definitive evidence of  
872 gene loss.

### 873 **3.5 COA1/MITRAC15 occurs in an evolutionary breakpoint region**

874 We find evidence of *COA1/MITRAC15* gene disrupting mutations and lack of gene  
875 expression in multiple RNA-seq datasets despite a conserved gene order in the rabbit  
876 (*Oryctolagus cuniculus*), naked mole-rat (*Heterocephalus glaber*), and four Sciuridae species  
877 (*Urocitellus parryii*, *Spermophilus dauricus*, *Ictidomys tridecemlineatus*, *Marmota marmota*  
878 *marmota*). The gene disrupting mutations identified in the rabbit *COA1/MITRAC15* gene  
879 includes a two-base pair deletion at the 22<sup>nd</sup> codon of exon-1 and single base pair deletions in  
880 exon-2 at the 13<sup>th</sup> and 37<sup>th</sup> codons. Gene disrupting changes in the third exon consist of a  
881 five-base insertion between the 11<sup>th</sup> and 12<sup>th</sup> codon, one base insertion at the 17<sup>th</sup> codon, and  
882 one base deletion in the 23<sup>rd</sup> codon (see **Fig. 6** and **Supplementary Table S13**). These six  
883 gene-disrupting changes result in premature stop codons in exon-2 and exon-4. Gene loss in  
884 the rabbit is estimated to have occurred between 12 MYA and 17 MYA (see **Fig. 6** and  
885 **Supplementary Table S17**). The lack of *COA1/MITRAC15* RNA-seq reads in tissues such as  
886 the brain, liver, and testis that express *COA1/MITRAC15* in closely related species supports  
887 the loss of the *COA1/MITRAC15* gene in the naked mole-rat. Besides the lack of a start  
888 codon, a single gene disrupting mutation is found in the naked mole-rat *COA1/MITRAC15*  
889 gene and consists of a single base deletion at the 21<sup>st</sup> codon of exon-1. Gene loss in the naked  
890 mole-rat is estimated between 7 MYA and 11 MYA (see **Supplementary Table S17** and **Fig.**  
891 **6**).

892 The presence of common gene disrupting changes such as a one base pair insertion at second  
893 codon of exon-1, two base pair insertion at 25<sup>th</sup> codon of exon-2, seven base pair deletion  
894 between 25<sup>th</sup> and 26<sup>th</sup> codon of exon-4, and a 2-base insertion at 33<sup>rd</sup> codon of exon-4  
895 supports a shared gene loss in four Sciuridae species (*Urocitellus parryii*, *Spermophilus*  
896 *dauricus*, *Ictidomys tridecemlineatus*, *Marmota marmota marmota*). The *COAI/MITRAC15*  
897 gene of alpine marmot has additional gene disrupting changes consisting of a 2-base insertion  
898 between the 8<sup>th</sup> and 9<sup>th</sup> codon of exon-1 and a single nucleotide substitution at the 26<sup>th</sup> codon  
899 of exon-2. The 2-base insertion at the 33<sup>rd</sup> codon of exon-4 has extended to a five-base pair  
900 insertion in the Daurian ground squirrel (*Spermophilus dauricus*). The estimated time of gene  
901 loss for this shared event is between 10 MYA and 30 MYA (see **Supplementary Table S17**  
902 and **Fig. 6**).

903 The presence of intact open reading frames robustly expressed at syntenic locations in closely  
904 related (~30 to 50 million years) species strongly supports at least three independent  
905 *COAI/MITRAC15* gene loss events (see **Fig. 6**). Multiple gene-disrupting mutations in the  
906 *COAI/MITRAC15* gene of the North American beaver (*Castor canadensis*) suggest a fourth  
907 independent gene loss event. Gene-disrupting mutations in the beaver result in at least two  
908 premature stop codons. In the first exon, single-base deletions occur in the 3<sup>rd</sup> and 20<sup>th</sup> codon,  
909 a four-base insertion occurs between 33<sup>rd</sup> and 34<sup>th</sup> codon. The second exon has a single-base  
910 deletion in the 33<sup>rd</sup> codon and a seven-base pair deletion between 29<sup>th</sup> and 30<sup>th</sup> codons. A  
911 single base deletion occurs at the 12<sup>th</sup> codon of exon-3 (see **Supplementary Table S13** and  
912 **Fig. 6**). The genome assembly of the North American beaver is fragmented, and the synteny  
913 of the flanking regions cannot be verified. The Illumina sequencing raw reads support the  
914 gene disrupting mutations identified in the genome assembly (**Supplementary File S1**), and  
915 duplicate copies don't occur. The loss of the *COAI/MITRAC15* gene in the beaver is  
916 estimated to have occurred sometime between 3 MYA and 23 MYA (see **Supplementary**  
917 **Table S17** and **Fig. 6**).

918 The North American beaver is phylogenetically closely related to the Ord's kangaroo rat  
919 (*Dipodomys ordii*) and the lesser Egyptian jerboa (*Jaculus jaculus*). The more contiguous  
920 genome assemblies of the jerboa and kangaroo rat allow verification of a conserved gene  
921 order likely to be shared by the North American beaver (see **Fig. 6**). The presence of  
922 repetitive elements and lack of long-read sequencing data in most rodent species prevents  
923 genome assembly verification. Hence, we have screened the genomes of several closely  
924 related rodent species and verified the genome assemblies using long-read sequencing data or  
925 cloned fragments that cover parts of the genome. Gaps in the genome assembly also hamper  
926 the identification of the correct gene order. Previous reports that examined genome  
927 assemblies and EST data have claimed loss of the *STK17A* gene in mice due to a  
928 chromosomal rearrangement spanning this genomic region (Fitzgerald and Bateman, 2004).  
929 Detailed examination of gene order flanking the *COAI/MITRAC15* locus in several rodent  
930 genomes revealed the occurrence of this previously reported chromosomal rearrangement  
931 event (see **Fig. 6**).

932 Identifying gene loss events coinciding with EBRs is notoriously challenging and has  
933 motivated nuanced inferences in both bird (Botero-Castro et al., 2017) and rodent species

934 (Hargreaves et al., 2017). Nonetheless, more than a dozen rodent species share the putative  
935 combined loss of *STK17A* and *COA1/MITRAC15* (see **Fig. 6**). Based on the presence of  
936 adjacent genes, the rearranged regions could be tracked down to two different chromosomes  
937 (see **Fig. 6, O6, and O9**). Genes on the left flank of *STK17A-COA1-BLVRA* consist of  
938 *PSMA2*, *MRPL32*, and *HECW1* in gene orders O1 to O5. After the chromosomal  
939 rearrangement, the same sequence of genes can be found in gene order O9 and occur adjacent  
940 to *ARID4B* and *GGPS1*. Genes on the right flank of *STK17A-COA1-BLVRA* consist of  
941 *MRPS24*, *URGCP*, and *UBE2D4* in gene order O4. Several other gene orders (O1 to O5)  
942 occur on the right flank in various species. The sequence of genes found on the right flank in  
943 gene order O4 is also found sequentially in gene order O6 and occurs adjacent to *ANKRD36*  
944 and *CCDC117* after the chromosomal rearrangement.

945 We found that the *BLVRA* gene has translocated to an entirely new location and does not co-  
946 occur with either the left or right flank. However, the new location of the *BLVRA* gene  
947 between the *NCAPH* and *ITPRIPL1* genes on the left flank and *AP4E1* and *SPPL2A* genes on  
948 the right flank is consistently conserved across all 14 post-EBR species and corresponds to  
949 gene order O7. Both *COA1/MITRAC15* and *STK17A* are missing in the post-EBR rodent  
950 genome assemblies. The search of the genome assemblies, sequencing raw read datasets, and  
951 RNA-seq datasets also failed to find any evidence of an intact *COA1/MITRAC15* or *STK17A*  
952 gene. All raw read and genome assembly hits for *STK17A* while using queries from pre-EBR  
953 rodent genomes could be traced back to the *STK17B* gene that matches with the *STK17A* gene  
954 at a short sequence stretch. The *STK17A* gene is lost or has sequence properties that prevent it  
955 from being sequenced with currently available technologies. The exon-1 region of  
956 *COA1/MITRAC15* occurs in a gene desert region between *PTPRF* and *HYI* genes in post-  
957 EBR species. Using blast search of *COA1/MITRAC15* introns, we found strong support for  
958 the existence of *COA1/MITRAC15* intron-2 close to the exon-1 hit. Pairwise genome  
959 alignments provide support for the presence of *COA1/MITRAC15* gene remains at this  
960 location (see **Supplementary File S6**). Notably, the *COA1/MITRAC15* remnants of a  
961 truncated exon-1 and intron-2 occur in the gene desert located between *PTPRF* and *HYI*  
962 genes only in post-EBR species. None of the pre-EBR species had any such remains. Hence,  
963 the *COA1/MITRAC15* remnants between *PTPRF* and *HYI* genes are unlikely to have resulted  
964 from duplicated copies of *COA1/MITRAC15*. The synteny of this region is well conserved  
965 with *KDM4A* and *PTPRF* on the left flank and *HYI* and *SZT2* on the right side and  
966 corresponds to gene order O8. Careful examination of this region in RNA-seq datasets found  
967 no evidence of transcripts.

968 Comparison of gene order in marsupial species with various outgroup species (including the  
969 platypus and short-beaked echidna from the order Monotremata) identified the presence of an  
970 independent chromosomal rearrangement event spanning the *COA1/MITRAC15* locus (see  
971 **Fig. 7**). In contrast to the rodent-specific EBR, we found that the *STK17A* gene is intact in  
972 post-EBR (gene order O2 and O3 in **Fig. 7**) marsupial species. However, an extensive search  
973 of marsupial genomes, transcriptomes, and raw sequencing read datasets (including high  
974 coverage Pacbio datasets for the Koala) failed to find any evidence of *COA1/MITRAC15*  
975 orthologs or its remnants. Lack of sequencing reads from *COA1/MITRAC15* in marsupial



976 species suggests either complete erosion of the gene or drastic change in sequence  
977 composition that eludes sequencing with currently available technologies.

#### 978 **4. Discussion**

979 Our search of the sequence databases identified that *COA1/MITRAC15* and *TIMM21* are  
980 distant homologs with representative genes found in animals, plants, and fungi. The  
981 occurrence of *COA1/MITRAC15* homologs in  $\alpha$ -proteobacteria supports an ancestral role for  
982 these genes (Kurland and Andersson, 2000). Endosymbiotic theories explain the origin of  
983 eukaryotes and their mitochondria (Martin et al., 2015). Cells that lacked mitochondria never  
984 attained the complexity seen in eukaryotes. Hence, true intermediates to this transition from  
985 prokaryotes to eukaryotes are not available. The number of genes within mitochondria varies  
986 from five to over a hundred in different eukaryotes (Bevan and Lang, 2004). Species with a  
987 higher number of genes in the mitochondria provide a snapshot of the endocytosed bacteria-  
988 like ancestral entity. The gene-rich mitochondrial genomes of Jakobid protists are models to  
989 study the evolution of mitochondria (Burger et al., 2013). Although *TIMM21* homologs are  
990 present in the genome of the Jakobid *Andalucia godoyi*, the *COA1/MITRAC15* gene is  
991 missing (Gray et al., 2020). The single-copy homologs of *TIMM21* and *COA1/MITRAC15* in  
992 bacterial species and Jakobid protist mitochondria suggest that duplication of *TIMM21* might  
993 have occurred during the movement of *TIMM21* homologs from the mitochondria to the  
994 nucleus. A sampling of more Jakobid genomes might resolve the timing of duplication of  
995 *TIMM21* to *COA1/MITRAC15*.

996 The *COA1/MITRAC15* gene has undergone subsequent duplication events in carnivores and  
997 primates. The prevalence of such duplication events suggests that either a higher  
998 *COA1/MITRAC15* protein dosage is not harmful or sophisticated regulatory machinery to  
999 maintain the correct dosage exists. Genes with duplicated copies have greater flexibility for  
1000 subfunctionalization or neofunctionalisation (Taylor and Raes, 2004). In contrast to gene  
1001 duplication, the origin of new splice-isoforms increases the transcriptome complexity without  
1002 increasing the gene count. The evolution of phenotypic novelty through alternative splicing  
1003 has received greater attention thanks to the availability of large-scale transcriptomic and  
1004 proteomic datasets in diverse species (Bush et al., 2017). While positive selection has a role  
1005 in specific examples of alternative splicing (Parker et al., 2014; Ramensky et al., 2008), the  
1006 vast majority of splicing is probably noisy, and neutral processes may explain its evolution  
1007 (Pickrell et al., 2010). Alternative splicing also reduces premature protein truncation due to  
1008 purifying selection (Xing and Lee, 2004). In the case of felid species, the alternative splicing  
1009 of the third exon (see **Fig. 2**) may have evolved in response to the gene-disrupting changes.  
1010 Verifying the relevance of the alternative splicing observed at the transcriptional level would  
1011 require further scrutiny of the protein level isoforms of the *COA1/MITRAC15* gene in felid  
1012 and canid species. In primate species, the potential addition of the extra coding-exon occurs  
1013 by a shift of the start codon into the untranslated region. Such changes at the reading frame  
1014 termini occur when the gene is under relaxed selective constraints (Shinde et al., 2019).  
1015 Acquisition of novel protein-coding sequences through changes in the exon length is also  
1016 known to occur (Kishida et al., 2018). We speculate that drastic lineage-specific changes in

1017 purifying selection have allowed for changes in intron-exon structure resulting in the  
1018 evolution of new splice-isoforms of *COAI/MITRAC15*.

1019 Gene loss can be dealt with through compensation from another gene (Xiong and Lei, 2020)  
1020 or is associated with a biological pathway rewiring (Vijay, 2020). Large-scale changes in  
1021 gene content are associated with major evolutionary transitions that drastically alter the  
1022 fitness landscape. Prominent examples of such shifts are the origin of flight in birds  
1023 (Meredith et al., 2014) and the movement of mammals from land to water seen in cetaceans  
1024 (Huelsmann et al., 2019). Recurrent gene loss events following relaxed selective constraint in  
1025 various other lineages have also been documented (Schneider et al., 2019; Sharma and Hiller,  
1026 2018; Valente et al., 2020). Loss of genes in the Galliform lineage while being intact in the  
1027 Anseriformes lineage has been linked to differences in the immune response of these clades  
1028 (Barber et al., 2010; S. Sharma et al., 2020). The *COAI/MITRAC15* gene is not known to  
1029 have any obvious immune functions, and its loss in Galliform birds appears to be a  
1030 consequence of relaxed selection on the OXPHOS pathway. Our computational analysis of  
1031 more than 200 vertebrate genomes has found that the *COAI/MITRAC15* gene is intact and  
1032 transcribed in most species, except for the Cheetah, Galliformes, rodents, and marsupial  
1033 species. Notably, the detailed investigation of the *COAI/MITRAC15* gene in other bird  
1034 species that are flightless or have a limited ability to fly has found an intact transcribed gene.  
1035 Therefore, the loss of the *COAI/MITRAC15* gene appears to be associated with changes in  
1036 skeletal muscle fiber composition. The prominent role of mitochondria in skeletal muscles is  
1037 evident from diseases of the muscle tissue caused by defects in mitochondrial genes (Gan et  
1038 al., 2018).

1039

1040 The correlation between recurrent gene loss and the presence of specific phenotypes has  
1041 provided crucial insights into the evolution of these traits. Stomach loss in gnathostomes co-  
1042 occurs with the loss of several genes that code for digestive enzymes (Castro et al., 2013).  
1043 The loss of ketogenesis has occurred through the recurrent loss of the *HMGCS2* gene (Jebb  
1044 and Hiller, 2018). Gene losses associated with dietary composition, the patterns of feeding,  
1045 and gut microbiomes have also been identified (Hecker et al., 2019). Recurrent loss of Toll-  
1046 like receptors (TLRs), which play prominent roles in the innate immune system, is associated  
1047 with impaired ability to detect extracellular flagellin (V. Sharma et al., 2020). The repeated  
1048 loss of the cortistatin gene is related to modifications in the circadian pathway (Valente et al.,  
1049 2020). In the *COAI/MITRAC15* gene, we record the independent occurrence of gene  
1050 disrupting changes in closely related species of Galliformes and rodents. However, we can  
1051 rule out the possibility of a common regulatory mutation that initially resulted in the loss of  
1052 gene expression followed by the independent accumulation of the gene disrupting changes  
1053 that we observe. Our hypothesis predicts gene loss following changes in skeletal muscle fiber  
1054 composition. The *COAI/MITRAC15* gene does not directly alter the muscle fiber composition  
1055 and might have subsequently experienced relaxed selective constraint due to increased  
1056 glycolytic muscle fibers. Hence, it is tempting to speculate that the independent gene  
1057 disrupting changes reflect recurrent gene loss events. However, the mechanistic basis of  
1058 changes in muscle fiber composition between species is yet to be understood. Identifying the

1059 genetic changes that determine muscle fiber composition and the sequence of events would  
1060 provide greater clarity regarding when and why the *COAI/MITRAC15* gene loss occurred.

1061 Evolutionary Breakpoint Regions (EBRs) are genomic regions that have undergone one or  
1062 more structural changes resulting in altered karyotypes between lineages (Lemaitre et al.,  
1063 2009). Recurrent non-random structural changes at the same regions in multiple lineages  
1064 potentially occur due to the presence of repeat elements (Farré et al., 2016; Schibler et al.,  
1065 2006), chromosome fragile sites (Durkin and Glover, 2007; Ruiz-Herrera et al., 2006, 2005),  
1066 nucleotide composition, methylation level (Carbone et al., 2009) and chromatin state (Boteva  
1067 et al., 2020; Huvet et al., 2007). However, the prevalence of EBRs and their relevance to  
1068 evolutionary processes has been the focus of considerable debate (Alekseyev and Pevzner,  
1069 2007; Peng et al., 2006; Trinh et al., 2004). Several lineage-specific gene loss events near  
1070 EBRs in rodents are due to chromosomal rearrangements (Capilla et al., 2016; Fitzgerald and  
1071 Bateman, 2004). Notably, one of these lost genes, *STK17A*, is located adjacent to the  
1072 *COAI/MITRAC15* gene. The co-occurrence of an EBR with putative *COAI/MITRAC15* gene  
1073 loss in rodents and marsupials is very intriguing. However, rodent genomes have mutational  
1074 hotspots with high lineage-specific gBGC resulting in a substantial gene sequence divergence  
1075 (Hargreaves et al., 2017). Such highly diverged orthologs can be challenging to identify due  
1076 to difficulties in sequencing high GC regions. In *COAI/MITRAC15*, the magnitude of gBGC  
1077 is relatively low, especially in rodents. Moreover, we find remnants of *COAI/MITRAC15* in  
1078 several post-EBR species that suggest actual gene loss, at least in rodents. Several pre-EBR  
1079 rodent species have also independently accumulated gene disrupting mutations in the  
1080 *COAI/MITRAC15* gene. Hence, the *COAI/MITRAC15* gene appears to be under relaxed  
1081 selective constraint even before the occurrence of the EBR.

1082 Species with exceptionally large body sizes or extremely long lifespans have a greater  
1083 number of cell divisions. An increment in the number of cell divisions enhances cancer risk.  
1084 However, paradoxically, large-bodied animals like elephants and whales do not have a higher  
1085 incidence of cancer (Peto et al., 1975; Tollis et al., 2017). Cancer resistance due to lineage-  
1086 specific changes in gene content may explain this paradox (Caulin et al., 2015; Caulin and  
1087 Maley, 2011; DeGregori, 2011). While specific genetic changes in mammalian species lead  
1088 to cancer resistance (Tollis et al., 2019; Vazquez et al., 2018), the reasons for lower cancer  
1089 incidence in birds compared to mammals are mostly unexplored (Møller et al., 2017).  
1090 Interestingly, the *COAI/MITRAC15* gene is an oncogene with a role in colorectal cancer (Xue  
1091 et al., 2020), and its loss could reduce cancer risk. Silencing of *COAI/MITRAC15* by  
1092 miRNAs strongly suppresses Giant cell tumors of the bone (Fellenberg et al., 2016; Herr et  
1093 al., 2017). Our discovery of *COAI/MITRAC15* gene loss in Galliformes sets a precedent for  
1094 the indisputable identification of gene loss events in birds and might reveal other oncogenes  
1095 which are lost. We also identify *COAI/MITRAC15* gene loss in the beaver and naked mole-  
1096 rat genomes, species that are models to study longevity (Zhou et al., 2020). High-quality  
1097 near-complete vertebrate genomes with very few errors will further aid in the large-scale  
1098 identification of gene loss events across the vertebrate phylogeny (Rhie et al., 2021).

## 1099 5. Conclusions

1100 *COA1/MITRAC15* is a distant homolog of the *TIMM21* gene that has undergone recurrent  
1101 gene loss in several Galliform and rodent species. Gene loss events occurred between 15  
1102 MYA and 46 MYA in Galliform species and between 2 MYA and 30 MYA in rodents. The  
1103 gene loss event occurs in species that rely primarily on glycolytic muscle fibers to achieve  
1104 short bursts of activity. We show that *COA1/MITRAC15* and the adjacent *STK17A* gene are  
1105 located at an Evolutionary Breakpoint Region (EBR) and are missing from the genomes of  
1106 several rodent species following chromosomal rearrangement events. Pseudogenic and  
1107 functional copies of *COA1/MITRAC15* are present in carnivores and primates, with the  
1108 functional copy diverging in its intron-exon structure. Prevalence of repeated gene loss and  
1109 duplication events in the history of *COA1/MITRAC15* not only demonstrates the  
1110 dispensability of this gene but also hints at its ability to provide fitness increases in a context-  
1111 dependent manner.

## 1112 **Acknowledgment**

1113 We thank the Council of Scientific & Industrial Research for fellowship to SSS and the  
1114 Ministry of Human Resource Development for fellowship to LT and SS and University  
1115 Grants commission to AS. NV has been awarded the Innovative Young Biotechnologist  
1116 Award 2018 from the Department of Biotechnology (Government of India).

## 1117 **Competing interest statement**

1118 None to declare

## 1119 **Availability of data**

1120 All data associated with this study are available in the Supplementary Materials.

## 1121 **References**

- 1122 Adams, K.L., Palmer, J.D., 2003. Evolution of mitochondrial gene content: Gene loss and  
1123 transfer to the nucleus. *Mol. Phylogenet. Evol.* 29, 380–395.  
1124 [https://doi.org/10.1016/S1055-7903\(03\)00194-5](https://doi.org/10.1016/S1055-7903(03)00194-5)
- 1125 Akiyama, T., Nishida, C., Momose, K., Onuma, M., Takami, K., Masuda, R., 2017. Gene  
1126 duplication and concerted evolution of mitochondrial DNA in crane species. *Mol.*  
1127 *Phylogenet. Evol.* 106, 158–163. <https://doi.org/10.1016/j.ympev.2016.09.026>
- 1128 Al-Ssulami, A.M., Azmi, A.M., Hussain, M., 2020. CodSeqGen: A tool for generating  
1129 synonymous coding sequences with desired GC-contents. *Genomics* 112, 237–242.  
1130 <https://doi.org/10.1016/j.ygeno.2019.02.002>
- 1131 Alekseyev, M.A., Pevzner, P.A., 2007. Are there rearrangement hotspots in the human  
1132 genome? *PLoS Comput. Biol.* 3, 2111–2121.  
1133 <https://doi.org/10.1371/journal.pcbi.0030209>
- 1134 Altschul, S.F., Madden, T.L., Schäffer, A.A., Zhang, J., Zhang, Z., Miller, W., Lipman, D.J.,  
1135 1997. Gapped BLAST and PSI-BLAST: A new generation of protein database search  
1136 programs. *Nucleic Acids Res.* <https://doi.org/10.1093/nar/25.17.3389>

- 1137 Bailey, I., Myatt, J.P., Wilson, A.M., 2013. Group hunting within the Carnivora:  
1138 Physiological, cognitive and environmental influences on strategy and cooperation.  
1139 *Behav. Ecol. Sociobiol.* <https://doi.org/10.1007/s00265-012-1423-3>
- 1140 Barber, M.R.W., Aldridge, J.R., Webster, R.G., Magor, K.E., Magor, K.E., 2010. Association  
1141 of RIG-I with innate immunity of ducks to influenza. *Proc. Natl. Acad. Sci. U. S. A.*  
1142 107, 5913–8. <https://doi.org/doi:10.1073/pnas.1001755107>
- 1143 Barnard, E.A., Lyles, J.M., Pizzey, J.A., 1982. Fibre types in chicken skeletal muscles and  
1144 their changes in muscular dystrophy. *J. Physiol.* 331, 333–354.  
1145 <https://doi.org/10.1113/jphysiol.1982.sp014375>
- 1146 Bevan, R.B., Lang, B.F., 2004. Mitochondrial genome evolution: the origin of mitochondria  
1147 and of eukaryotes. Springer, Berlin, Heidelberg, pp. 1–35.  
1148 <https://doi.org/10.1007/b96830>
- 1149 Björnerfeldt, S., Webster, M.T., Vilà, C., 2006. Relaxation of selective constraint on dog  
1150 mitochondrial DNA following domestication. *Genome Res.* 16, 990–994.  
1151 <https://doi.org/10.1101/gr.5117706>
- 1152 Botero-Castro, F., Figuet, E., Tilak, M.K., Nabholz, B., Galtier, N., 2017. Avian genomes  
1153 revisited: Hidden genes uncovered and the rates versus traits paradox in birds. *Mol. Biol.*  
1154 *Evol.* 34, 3123–3131. <https://doi.org/10.1093/molbev/msx236>
- 1155 Boteva, L., Nozawa, R.S., Naughton, C., Samejima, K., Earnshaw, W.C., Gilbert, N., 2020.  
1156 Common Fragile Sites Are Characterized by Faulty Condensin Loading after  
1157 Replication Stress. *Cell Rep.* 32. <https://doi.org/10.1016/j.celrep.2020.108177>
- 1158 Burger, G., Gray, M.W., Forget, L., Lang, B.F., 2013. Strikingly bacteria-like and gene-rich  
1159 mitochondrial genomes throughout jakobid protists. *Genome Biol. Evol.* 5, 418–438.  
1160 <https://doi.org/10.1093/gbe/evt008>
- 1161 Bush, S.J., Chen, L., Tovar-Corona, J.M., Urrutia, A.O., 2017. Alternative splicing and the  
1162 evolution of phenotypic novelty. *Philos. Trans. R. Soc. Lond. B. Biol. Sci.* 372, 1–7.
- 1163 Butler, P.J., 2016. The physiological basis of bird flight. *Philos. Trans. R. Soc. B Biol. Sci.*  
1164 <https://doi.org/10.1098/rstb.2015.0384>
- 1165 Capilla, L., Sánchez-Guillén, R.A., Farré, M., Paytuví-Gallart, A., Malinverni, R., Ventura,  
1166 J., Larkin, D.M., Ruiz-Herrera, A., 2016. Mammalian comparative genomics reveals  
1167 genetic and epigenetic features associated with genome reshuffling in rodentia. *Genome*  
1168 *Biol. Evol.* 8, 3703–3717. <https://doi.org/10.1093/gbe/evw276>
- 1169 Capra, J.A., Hubisz, M.J., Kostka, D., Pollard, K.S., Siepel, A., 2013. A Model-Based  
1170 Analysis of GC-Biased Gene Conversion in the Human and Chimpanzee Genomes.  
1171 *PLoS Genet.* <https://doi.org/10.1371/journal.pgen.1003684>
- 1172 Carbone, L., Harris, R.A., Vessere, G.M., Mootnick, A.R., Humphray, S., Rogers, J., Kim,  
1173 S.K., Wall, J.D., Martin, D., Jurka, J., Milosavljevic, A., de Jong, P.J., 2009.  
1174 Evolutionary Breakpoints in the Gibbon Suggest Association between Cytosine  
1175 Methylation and Karyotype Evolution. *PLoS Genet.* 5, e1000538.  
1176 <https://doi.org/10.1371/journal.pgen.1000538>
- 1177 Cardol, P., 2011. Mitochondrial NADH:Ubiquinone oxidoreductase (complex I) in

- 1178 eukaryotes: A highly conserved subunit composition highlighted by mining of protein  
1179 databases. *Biochim. Biophys. Acta - Bioenerg.* 1807, 1390–1397.  
1180 <https://doi.org/10.1016/j.bbabi.2011.06.015>
- 1181 Castro, L.F.C., Goncalves, O., Mazan, S., Tay, B.-H., Venkatesh, B., Wilson, J.M., 2013.  
1182 Recurrent gene loss correlates with the evolution of stomach phenotypes in gnathostome  
1183 history. *Proc. R. Soc. B Biol. Sci.* 281, 20132669–20132669.  
1184 <https://doi.org/10.1098/rspb.2013.2669>
- 1185 Caulin, A.F., Graham, T.A., Wang, L.-S., Maley, C.C., 2015. Solutions to Peto’s paradox  
1186 revealed by mathematical modelling and cross-species cancer gene analysis. *Philos.*  
1187 *Trans. R. Soc. B Biol. Sci.* 370, 20140222. <https://doi.org/10.1098/rstb.2014.0222>
- 1188 Caulin, A.F., Maley, C.C., 2011. Peto’s Paradox: Evolution’s prescription for cancer  
1189 prevention. *Trends Ecol. Evol.* <https://doi.org/10.1016/j.tree.2011.01.002>
- 1190 Chen, Y.-C., Liu, T., Yu, C.-H., Chiang, T.-Y., Hwang, C.-C., 2013. Effects of GC Bias in  
1191 Next-Generation-Sequencing Data on De Novo Genome Assembly. *PLoS One* 8,  
1192 e62856. <https://doi.org/10.1371/journal.pone.0062856>
- 1193 Conley, K.E., 2016. Mitochondria to motion: Optimizing oxidative phosphorylation to  
1194 improve exercise performance. *J. Exp. Biol.* <https://doi.org/10.1242/jeb.126623>
- 1195 Curry, J.W., Hohl, R., Noakes, T.D., Kohn, T.A., 2012. High oxidative capacity and type IIX  
1196 fibre content in springbok and fallow deer skeletal muscle suggest fast sprinters with a  
1197 resistance to fatigue. *J. Exp. Biol.* 215, 3997–4005. <https://doi.org/10.1242/jeb.073684>
- 1198 Das, J., 2006. The role of mitochondrial respiration in physiological and evolutionary  
1199 adaptation. *BioEssays.* <https://doi.org/10.1002/bies.20463>
- 1200 Dassi, E., 2017. Handshakes and fights: The regulatory interplay of RNA-binding proteins.  
1201 *Front. Mol. Biosci.* <https://doi.org/10.3389/fmolb.2017.00067>
- 1202 DeGregori, J., 2011. Evolved tumor suppression: Why are we so good at not getting cancer?  
1203 *Cancer Res.* <https://doi.org/10.1158/0008-5472.CAN-11-0342>
- 1204 Depamphilis, C.W., Young, N.D., Wolfe, A.D., 1997. Evolution of plastid gene *rps2* in a  
1205 lineage of hemiparasitic and holoparasitic plants: Many losses of photosynthesis and  
1206 complex patterns of rate variation. *Proc. Natl. Acad. Sci. U. S. A.* 94, 7367–7372.  
1207 <https://doi.org/10.1073/pnas.94.14.7367>
- 1208 Dial, K.P., 2003. Evolution of Avian Locomotion: Correlates of Flight Style, Locomotor  
1209 Modules, Nesting Biology, Body Size, Development, and The Origin of Flapping Flight.  
1210 *Auk* 120, 941–952. <https://doi.org/10.1093/auk/120.4.941>
- 1211 Doan, J.W., Schmidt, T.R., Wildman, D.E., Uddin, M., Goldberg, A., Hüttemann, M.,  
1212 Goodman, M., Weiss, M.L., Grossman, L.I., 2004. Coadaptive evolution in cytochrome  
1213 c oxidase: 9 of 13 subunits show accelerated rates of nonsynonymous substitution in  
1214 anthropoid primates. *Mol. Phylogenet. Evol.* 33, 944–950.  
1215 <https://doi.org/10.1016/j.ympev.2004.07.016>
- 1216 Dobin, A., Davis, C.A., Schlesinger, F., Drenkow, J., Zaleski, C., Jha, S., Batut, P., Chaisson,  
1217 M., Gingeras, T.R., 2013. STAR: Ultrafast universal RNA-seq aligner. *Bioinformatics.*

- 1218 DuBay, S.G., Wu, Y., Scott, G.R., Qu, Y., Liu, Q., Smith, J.H., Xin, C., Hart Reeve, A.,  
1219 Juncheng, C., Meyer, D., Wang, J., Johnson, J., Cheviron, Z.A., Lei, F., Bates, J., 2020.  
1220 Life history predicts flight muscle phenotype and function in birds. *J. Anim. Ecol.* 89,  
1221 1262–1276. <https://doi.org/10.1111/1365-2656.13190>
- 1222 Durkin, S.G., Glover, T.W., 2007. Chromosome fragile sites. *Annu. Rev. Genet.*  
1223 <https://doi.org/10.1146/annurev.genet.41.042007.165900>
- 1224 Dutheil, J., 2008. Detecting site-specific biochemical constraints through substitution  
1225 mapping. *J. Mol. Evol.* 67, 257–265. <https://doi.org/10.1007/s00239-008-9139-8>
- 1226 Emre, Y., Hurtaud, C., Ricquier, D., Bouillaud, F., Hughes, J., Criscuolo, F., 2007. Avian  
1227 UCP: The killjoy in the evolution of the mitochondrial uncoupling proteins. *J. Mol.*  
1228 *Evol.* 65, 392–402. <https://doi.org/10.1007/s00239-007-9020-1>
- 1229 Farré, M., Narayan, J., Slavov, G.T., Damas, J., Auvil, L., Li, C., Jarvis, E.D., Burt, D.W.,  
1230 Griffin, D.K., Larkin, D.M., 2016. Novel insights into chromosome evolution in birds,  
1231 archosaurs, and reptiles. *Genome Biol. Evol.* 8, 2442–2451.  
1232 <https://doi.org/10.1093/gbe/evw166>
- 1233 Fellenberg, J., Sähr, H., Kunz, P., Zhao, Z., Liu, L., Tichy, D., Herr, I., 2016. Restoration of  
1234 miR-127-3p and miR-376a-3p counteracts the neoplastic phenotype of giant cell tumor  
1235 of bone derived stromal cells by targeting COA1, GLE1 and PDIA6. *Cancer Lett.* 371,  
1236 134–141. <https://doi.org/10.1016/j.canlet.2015.10.039>
- 1237 Fitzgerald, J., Bateman, J.F., 2004. Why mice have lost genes for COL21A1, STK17A,  
1238 GPR145 and AHRI: Evidence for gene deletion at evolutionary breakpoints in the rodent  
1239 lineage. *Trends Genet.* <https://doi.org/10.1016/j.tig.2004.07.002>
- 1240 Foote, A.D., Morin, P.A., Durban, J.W., Pitman, R.L., Wade, P., Willerslev, E., Gilbert,  
1241 M.T.P., da Fonseca, R.R., 2011. Positive selection on the killer whale mitogenome. *Biol.*  
1242 *Lett.* 7, 116–118. <https://doi.org/10.1098/rsbl.2010.0638>
- 1243 Frickey, T., Lupas, A., 2004. CLANS: A Java application for visualizing protein families  
1244 based on pairwise similarity. *Bioinformatics* 20, 3702–3704.  
1245 <https://doi.org/10.1093/bioinformatics/bth444>
- 1246 Fu, X.D., Ares, M., 2014. Context-dependent control of alternative splicing by RNA-binding  
1247 proteins. *Nat. Rev. Genet.* <https://doi.org/10.1038/nrg3778>
- 1248 Fukasawa, Y., Oda, T., Tomii, K., Imai, K., 2017. Origin and Evolutionary Alteration of the  
1249 Mitochondrial Import System in Eukaryotic Lineages. *Mol. Biol. Evol.* 34, 1574–1586.  
1250 <https://doi.org/10.1093/molbev/msx096>
- 1251 Gabaldón, T., Huynen, M.A., 2007. From endosymbiont to host-controlled organelle: The  
1252 hijacking of mitochondrial protein synthesis and metabolism. *PLoS Comput. Biol.* 3,  
1253 2209–2218. <https://doi.org/10.1371/journal.pcbi.0030219>
- 1254 Gabaldón, T., Rainey, D., Huynen, M.A., 2005. Tracing the evolution of a large protein  
1255 complex in the eukaryotes, NADH:ubiquinone oxidoreductase (Complex I). *J. Mol.*  
1256 *Biol.* 348, 857–870. <https://doi.org/10.1016/j.jmb.2005.02.067>
- 1257 Gabler, F., Nam, S., Till, S., Mirdita, M., Steinegger, M., Söding, J., Lupas, A.N., Alva, V.,  
1258 2020. Protein Sequence Analysis Using the MPI Bioinformatics Toolkit. *Curr. Protoc.*

- 1259 Bioinforma. 72, 108. <https://doi.org/10.1002/cpbi.108>
- 1260 Gan, Z., Fu, T., Kelly, D.P., Vega, R.B., 2018. Skeletal muscle mitochondrial remodeling in  
1261 exercise and diseases. *Cell Res.* <https://doi.org/10.1038/s41422-018-0078-7>
- 1262 Garvin, M.R., Bielawski, J.P., Sazanov, L.A., Gharrett, A.J., 2015. Review and meta-analysis  
1263 of natural selection in mitochondrial complex I in metazoans. *J. Zool. Syst. Evol. Res.*  
1264 53, 1–17. <https://doi.org/10.1111/jzs.12079>
- 1265 Gaudry, M.J., Jastroch, M., Treberg, J.R., Hofreiter, M., Paijmans, J.L.A., Starrett, J., Wales,  
1266 N., Signore, A. V., Springer, M.S., Campbell, K.L., 2017. Inactivation of thermogenic  
1267 UCP1 as a historical contingency in multiple placental mammal clades. *Sci. Adv.* 3,  
1268 e1602878. <https://doi.org/10.1126/sciadv.1602878>
- 1269 Gautier, R., Douguet, D., Antonny, B., Drin, G., 2008. HELIQUEST: a web server to screen  
1270 sequences with specific  $\alpha$ -helical properties. *Bioinformatics* 24, 2101–2102.  
1271 <https://doi.org/10.1093/bioinformatics/btn392>
- 1272 Gissi, C., Iannelli, F., Pesole, G., 2008. Evolution of the mitochondrial genome of Metazoa as  
1273 exemplified by comparison of congeneric species. *Heredity (Edinb).*  
1274 <https://doi.org/10.1038/hdy.2008.62>
- 1275 Gray, M.W., Burger, G., Derelle, R., Klimeš, V., Leger, M.M., Sarrasin, M., Vlček, Č.,  
1276 Roger, A.J., Eliáš, M., Lang, B.F., 2020. The draft nuclear genome sequence and  
1277 predicted mitochondrial proteome of *Andalucia godoyi*, a protist with the most gene-rich  
1278 and bacteria-like mitochondrial genome. *BMC Biol.* 18. <https://doi.org/10.1186/s12915-020-0741-6>
- 1280 Grossman, L.I., Wildman, D.E., Schmidt, T.R., Goodman, M., 2004. Accelerated evolution  
1281 of the electron transport chain in anthropoid primates. *Trends Genet.*  
1282 <https://doi.org/10.1016/j.tig.2004.09.002>
- 1283 Gu, Z., Steinmetz, L.M., Gu, X., Scharfe, C., Davis, R.W., Li, W.H., 2003. Role of duplicate  
1284 genes in genetic robustness against null mutations. *Nature* 421, 63–66.  
1285 <https://doi.org/10.1038/nature01198>
- 1286 Hargreaves, A.D., Zhou, L., Christensen, J., Marlétaz, F., Liu, S., Li, F., Jansen, P.G., Spiga,  
1287 E., Hansen, M.T., Pedersen, S.V.H., Biswas, S., Serikawa, K., Fox, B.A., Taylor, W.R.,  
1288 Mulley, J.F., Zhang, G., Heller, R.S., Holland, P.W.H., 2017. Genome sequence of a  
1289 diabetes-prone rodent reveals a mutation hotspot around the ParaHox gene cluster. *Proc.*  
1290 *Natl. Acad. Sci. U. S. A.* 114, 7677–7682. <https://doi.org/10.1073/pnas.1702930114>
- 1291 Harshman, J., Braun, E.L., Braun, M.J., Huddleston, C.J., Bowie, R.C.K., Chojnowski, J.L.,  
1292 Hackett, S.J., Han, K.L., Kimball, R.T., Marks, B.D., Miglia, K.J., Moore, W.S., Reddy,  
1293 S., Sheldon, F.H., Steadman, D.W., Stepan, S.J., Witt, C.C., Yuri, T., 2008.  
1294 Phylogenomic evidence for multiple losses of flight in ratite birds. *Proc. Natl. Acad. Sci.*  
1295 *U. S. A.* 105, 13462–13467. <https://doi.org/10.1073/pnas.0803242105>
- 1296 Hatefi, Y., 1985. The Mitochondrial Electron Transport and Oxidative Phosphorylation  
1297 System. *Annu. Rev. Biochem.* 54, 1015–1069.  
1298 <https://doi.org/10.1146/annurev.bi.54.070185.005055>
- 1299 Hecker, N., Sharma, V., Hiller, M., 2019. Convergent gene losses illuminate metabolic and



- 1300 physiological changes in herbivores and carnivores. *Proc. Natl. Acad. Sci. U. S. A.* 116,  
1301 3036–3041. <https://doi.org/10.1073/pnas.1818504116>
- 1302 Hecker, N., Sharma, V., Hiller, M., 2017. Transition to an Aquatic Habitat Permitted the  
1303 Repeated Loss of the Pleiotropic *KLK8* Gene in Mammals. *Genome Biol. Evol.* 9,  
1304 3179–3188.
- 1305 Herr, I., Sähr, H., Zhao, Z., Yin, L., Omlor, G., Lehner, B., Fellenberg, J., 2017. MiR-127 and  
1306 miR-376a act as tumor suppressors by in vivo targeting of *COA1* and *PDIA6* in giant  
1307 cell tumor of bone. *Cancer Lett.* 409, 49–55.  
1308 <https://doi.org/10.1016/j.canlet.2017.08.029>
- 1309 Hess, D.C., Myers, C.L., Huttenhower, C., Hibbs, M.A., Hayes, A.P., Paw, J., Clore, J.J.,  
1310 Mendoza, R.M., Luis, B.S., Nislow, C., Giaever, G., Costanzo, M., Troyanskaya, O.G.,  
1311 Caudy, A.A., 2009. Computationally Driven, Quantitative Experiments Discover Genes  
1312 Required for Mitochondrial Biogenesis. *PLoS Genet.* 5, e1000407.  
1313 <https://doi.org/10.1371/journal.pgen.1000407>
- 1314 Hock, D.H., Robinson, D.R.L., Stroud, D.A., 2020. Blackout in the powerhouse: clinical  
1315 phenotypes associated with defects in the assembly of OXPHOS complexes and the  
1316 mitoribosome. *Biochem. J.* 477, 4085–4132. <https://doi.org/10.1042/BCJ20190767>
- 1317 Holmes, D.J., Austad, S.N., 1995. Birds as animal models for the comparative biology of  
1318 aging: A prospectus. *Journals Gerontol. - Ser. A Biol. Sci. Med. Sci.*  
1319 <https://doi.org/10.1093/gerona/50A.2.B59>
- 1320 Hubisz, M.J., Pollard, K.S., Siepel, A., 2011. Phast and Rphast: Phylogenetic analysis with  
1321 space/time models. *Brief. Bioinform.* 12, 41–51. <https://doi.org/10.1093/bib/bbq072>
- 1322 Huelsmann, M., Hecker, N., Springer, M.S., Gatesy, J., Sharma, V., Hiller, M., 2019. Genes  
1323 lost during the transition from land to water in cetaceans highlight genomic changes  
1324 associated with aquatic adaptations. *Sci. Adv.* 5, 6671–6696.  
1325 <https://doi.org/10.1126/sciadv.aaw6671>
- 1326 Hughes, D.A., Jastroch, M., Stoneking, M., Klingenspor, M., 2009. Molecular evolution of  
1327 *UCP1* and the evolutionary history of mammalian non-shivering thermogenesis. *BMC*  
1328 *Evol. Biol.* 9, 4. <https://doi.org/10.1186/1471-2148-9-4>
- 1329 Huvet, M., Nicolay, S., Touchon, M., Audit, B., D'Aubenton-Carafa, Y., Arneodo, A.,  
1330 Thermes, C., 2007. Human gene organization driven by the coordination of replication  
1331 and transcription. *Genome Res.* 17, 1278–1285. <https://doi.org/10.1101/gr.6533407>
- 1332 Huynen, M.A., Duarte, I., Szklarczyk, R., 2013. Loss, replacement and gain of proteins at the  
1333 origin of the mitochondria. *Biochim. Biophys. Acta - Bioenerg.*  
1334 <https://doi.org/10.1016/j.bbabi.2012.08.001>
- 1335 Hyatt, J.P.K., Roy, R.R., Stuart, R., Talmadge, R.J., 2010. Myosin heavy chain composition  
1336 of tiger (*Panthera tigris*) and cheetah (*Acinonyx jubatus*) hindlimb muscles. *J. Exp. Zool.*  
1337 *Part A Ecol. Genet. Physiol.* 313, 45–57. <https://doi.org/10.1002/jez.574>
- 1338 Iriarte-Díaz, J., 2002. Differential scaling of locomotor performance in small and large  
1339 terrestrial mammals, *Journal of Experimental Biology*. The Company of Biologists.  
1340 <https://doi.org/10.1242/JEB.205.18.2897>

- 1341 Jastroch, M., 2017. Uncoupling protein 1 controls reactive oxygen species in brown adipose  
1342 tissue. *Proc. Natl. Acad. Sci. U. S. A.* <https://doi.org/10.1073/pnas.1709064114>
- 1343 Jastroch, M., Wuertz, S., Kloas, W., Klingenspor, M., 2005. Uncoupling protein 1 in fish  
1344 uncovers an ancient evolutionary history of mammalian nonshivering thermogenesis.  
1345 *Physiol. Genomics* 22, 150–156. <https://doi.org/10.1152/physiolgenomics.00070.2005>
- 1346 Jebb, D., Hiller, M., 2018. Recurrent loss of HMGCS2 shows that ketogenesis is not essential  
1347 for the evolution of large mammalian brains. *Elife.* <https://doi.org/10.7554/eLife.38906>
- 1348 Karnkowska, A., Vacek, V., Zubáčová, Z., Treitli, S.C., Petrželková, R., Eme, L., Novák, L.,  
1349 Žárský, V., Barlow, L.D., Herman, E.K., Soukal, P., Hroudová, M., Doležal, P., Stairs,  
1350 C.W., Roger, A.J., Eliáš, M., Dacks, J.B., Vlček, Č., Hampl, V., 2016. A eukaryote  
1351 without a mitochondrial organelle. *Curr. Biol.* 26, 1274–1284.  
1352 <https://doi.org/10.1016/j.cub.2016.03.053>
- 1353 Kelley, L.A., Mezulis, S., Yates, C.M., Wass, M.N., Sternberg, M.J.E., 2015. The Phyre2  
1354 web portal for protein modeling, prediction and analysis. *Nat. Protoc.* 10, 845–858.  
1355 <https://doi.org/10.1038/nprot.2015.053>
- 1356 Kishida, T., Suzuki, M., Takayama, A., 2018. Evolution of the alternative AQP2 gene:  
1357 Acquisition of a novel protein-coding sequence in dolphins. *Mol. Phylogenet. Evol.* 118,  
1358 54–57. <https://doi.org/10.1016/j.ympev.2017.09.012>
- 1359 Kohn, T.A., 2014. Insights into the skeletal muscle characteristics of three southern African  
1360 antelope species. *Biol. Open* 3, 1037–1044. <https://doi.org/10.1242/bio.20149241>
- 1361 Kohn, T.A., Burroughs, R., Hartman, M.J., Noakes, T.D., 2011. Fiber type and metabolic  
1362 characteristics of lion (*Panthera leo*), caracal (*Caracal caracal*) and human skeletal  
1363 muscle. *Comp. Biochem. Physiol. - A Mol. Integr. Physiol.* 159, 125–133.  
1364 <https://doi.org/10.1016/j.cbpa.2011.02.006>
- 1365 Kohn, T.A., Myburgh, K.H., 2007. Regional specialization of rat quadriceps myosin heavy  
1366 chain isoforms occurring in distal to proximal parts of middle and deep regions is not  
1367 mirrored by citrate synthase activity. *J. Anat.* 210, 8–18. <https://doi.org/10.1111/j.1469-7580.2007.00661.x>
- 1369 Krauss, S., Zhang, C.Y., Lowell, B.B., 2005. The mitochondrial uncoupling-protein  
1370 homologues. *Nat. Rev. Mol. Cell Biol.* <https://doi.org/10.1038/nrm1592>
- 1371 Kurland, C.G., Andersson, S.G.E., 2000. Origin and Evolution of the Mitochondrial  
1372 Proteome. *Microbiol. Mol. Biol. Rev.* 64, 786–820.  
1373 <https://doi.org/10.1128/mubr.64.4.786-820.2000>
- 1374 Lavrov, D. V., Pett, W., 2016. Animal mitochondrial DNA as we do not know it: Mt-Genome  
1375 Organization and Evolution in Nonbilaterian Lineages. *Genome Biol. Evol.* 8, 2896–  
1376 2913. <https://doi.org/10.1093/gbe/evw195>
- 1377 Lemaitre, C., Zaghloul, L., Sagot, M.F., Gautier, C., Arneodo, A., Tannier, E., Audit, B.,  
1378 2009. Analysis of fine-scale mammalian evolutionary breakpoints provides new insight  
1379 into their relation to genome organisation. *BMC Genomics* 10.  
1380 <https://doi.org/10.1186/1471-2164-10-335>
- 1381 Mackiewicz, P., Urantówka, A.D., Krocak, A., Mackiewicz, D., Lavrov, D., 2019.

- 1382 Resolving Phylogenetic Relationships within Passeriformes Based on Mitochondrial  
1383 Genes and Inferring the Evolution of Their Mitogenomes in Terms of Duplications.  
1384 *Genome Biol. Evol.* 11, 2824–2849. <https://doi.org/10.1093/gbe/evz209>
- 1385 Marçais, G., Kingsford, C., 2011. A fast, lock-free approach for efficient parallel counting of  
1386 occurrences of k-mers. *Bioinformatics*. <https://doi.org/10.1093/bioinformatics/btr011>
- 1387 Martin, W.F., Garg, S., Zimorski, V., 2015. Endosymbiotic theories for eukaryote origin.  
1388 *Philos. Trans. R. Soc. B Biol. Sci.* <https://doi.org/10.1098/rstb.2014.0330>
- 1389 Mcgaugh, S., Schwartz, T.S., 2017. Here and there, but not everywhere: Repeated loss of  
1390 uncoupling protein 1 in amniotes. *Biol. Lett.* 13. <https://doi.org/10.1098/rsbl.2016.0749>
- 1391 Meredith, R.W., Gatesy, J., Murphy, W.J., Ryder, O.A., Springer, M.S., 2009. Molecular  
1392 decay of the tooth gene enamel (ENAM) mirrors the loss of enamel in the fossil record  
1393 of placental mammals. *PLoS Genet.* 5. <https://doi.org/10.1371/journal.pgen.1000634>
- 1394 Meredith, R.W., Zhang, G., Gilbert, M.T.P., Jarvis, E.D., Springer, M.S., 2014. Evidence for  
1395 a single loss of mineralized teeth in the common avian ancestor. *Science* 346, 1254390.  
1396 <https://doi.org/https://doi.org/10.1007/s00239-019-09903-6>
- 1397 Mick, D.U., Dennerlein, S., Wiese, H., Reinhold, R., Pacheu-Grau, D., Lorenzi, I., Sasarman,  
1398 F., Weraarpachai, W., Shoubridge, E.A., Warscheid, B., Rehling, P., 2012. MITRAC  
1399 links mitochondrial protein translocation to respiratory-chain assembly and translational  
1400 regulation. *Cell* 151, 1528–1541. <https://doi.org/10.1016/j.cell.2012.11.053>
- 1401 Mishra, P., Varuzhanyan, G., Pham, A.H., Chan, D.C., 2015. Mitochondrial Dynamics Is a  
1402 Distinguishing Feature of Skeletal Muscle Fiber Types and Regulates Organellar  
1403 Compartmentalization. *Cell Metab.* 22, 1033–1044.  
1404 <https://doi.org/10.1016/j.cmet.2015.09.027>
- 1405 Mitchell, P., 1961. Coupling of phosphorylation to electron and hydrogen transfer by a  
1406 chemi-osmotic type of mechanism. *Nature* 191, 144–148.  
1407 <https://doi.org/10.1038/191144a0>
- 1408 Møller, A.P., Erritzøe, J., Soler, J.J., 2017. Life history, immunity, Peto’s paradox and  
1409 tumours in birds. *J. Evol. Biol.* 30, 960–967. <https://doi.org/10.1111/jeb.13060>
- 1410 Montgomerie, S., Cruz, J.A., Shrivastava, S., Arndt, D., Berjanskii, M., Wishart, D.S., 2008.  
1411 PROTEUS2: a web server for comprehensive protein structure prediction and structure-  
1412 based annotation. *Nucleic Acids Res.* 36, W202. <https://doi.org/10.1093/nar/gkn255>
- 1413 Moore, L.A., Tidyman, W.E., Arrizubieta, M.J., Bandman, E., 1993. The evolutionary  
1414 relationship of avian and mammalian myosin heavy-chain genes. *J. Mol. Evol.* 36, 21–  
1415 30. <https://doi.org/10.1007/BF02407303>
- 1416 Murcha, M.W., Kubiszewski-Jakubiak, S., Wang, Y., Whelan, J., 2014. Evidence for  
1417 interactions between the mitochondrial import apparatus and respiratory chain  
1418 complexes via Tim21-like proteins in *Arabidopsis*. *Front. Plant Sci.* 5.  
1419 <https://doi.org/10.3389/fpls.2014.00082>
- 1420 Nabholz, B., Ellegren, H., Wolf, J.B.W., 2013. High levels of gene expression explain the  
1421 strong evolutionary constraint of mitochondrial protein-coding genes. *Mol. Biol. Evol.*  
1422 30, 272–284. <https://doi.org/10.1093/molbev/mss238>

- 1423 Nedergaard, J., Golozoubova, V., Matthias, A., Asadi, A., Jacobsson, A., Cannon, B., 2001.  
1424 UCP1: The only protein able to mediate adaptive non-shivering thermogenesis and  
1425 metabolic inefficiency. *Biochim. Biophys. Acta - Bioenerg.*  
1426 [https://doi.org/10.1016/S0005-2728\(00\)00247-4](https://doi.org/10.1016/S0005-2728(00)00247-4)
- 1427 Newman, S.A., Mezentseva, N. V., Badyaev, A. V., 2013. Gene loss, thermogenesis, and the  
1428 origin of birds. *Ann. N. Y. Acad. Sci.* 1289, 36–47. <https://doi.org/10.1111/nyas.12090>
- 1429 Obayashi, T., Kagaya, Y., Aoki, Y., Tadaka, S., Kinoshita, K., 2019. COXPRESdb v7: A  
1430 gene coexpression database for 11 animal species supported by 23 coexpression  
1431 platforms for technical evaluation and evolutionary inference. *Nucleic Acids Res.* 47,  
1432 D55–D62. <https://doi.org/10.1093/nar/gky1155>
- 1433 Ogata, T., Yamasaki, Y., 1997. Ultra-high-resolution scanning electron microscopy of  
1434 mitochondria and sarcoplasmic reticulum arrangement in human red, white, and  
1435 intermediate muscle fibers. *Anat. Rec.* 248, 214–223.  
1436 [https://doi.org/10.1002/\(SICI\)1097-0185\(199706\)248:2<214::AID-AR8>3.0.CO;2-S](https://doi.org/10.1002/(SICI)1097-0185(199706)248:2<214::AID-AR8>3.0.CO;2-S)
- 1437 Osoegawa, K., Tateno, M., Woon, P.Y., Frengen, E., Mammoser, A.G., Catanese, J.J.,  
1438 Hayashizaki, Y., De Jong, P.J., 2000. Bacterial artificial chromosome libraries for  
1439 mouse sequencing and functional analysis. *Genome Res.* 10, 116–128.  
1440 <https://doi.org/10.1101/gr.10.1.116>
- 1441 Palmer, J.D., Adams, K.L., Cho, Y., Parkinson, C.L., Qiu, Y.L., Song, K., 2000. Dynamic  
1442 evolution of plant mitochondrial genomes: Mobile genes and introns and highly variable  
1443 mutation rates. *Proc. Natl. Acad. Sci. U. S. A.* <https://doi.org/10.1073/pnas.97.13.6960>
- 1444 Pan, S., Lin, Y., Liu, Q., Duan, J., Lin, Z., Wang, Y., Wang, X., Lam, S.M., Zou, Z., Shui, G.,  
1445 Zhang, Y., Zhang, Z., Zhan, X., 2019. Convergent genomic signatures of flight loss in  
1446 birds suggest a switch of main fuel. *Nat. Commun.* 10. <https://doi.org/10.1038/s41467-019-10682-3>  
1447
- 1448 Parker, D.J., Gardiner, A., Neville, M.C., Ritchie, M.G., Goodwin, S.F., 2014. The evolution  
1449 of novelty in conserved genes; Evidence of positive selection in the *Drosophila* fruitless  
1450 gene is localised to alternatively spliced exons. *Heredity (Edinb).* 112, 300–306.  
1451 <https://doi.org/10.1038/hdy.2013.106>
- 1452 Paz, I., Kosti, I., Ares, M., Cline, M., Mandel-Gutfreund, Y., 2014. RBPmap: A web server  
1453 for mapping binding sites of RNA-binding proteins. *Nucleic Acids Res.* 42, W361.  
1454 <https://doi.org/10.1093/nar/gku406>
- 1455 Peng, Q., Pevzner, P.A., Tesler, G., 2006. The fragile breakage versus random breakage  
1456 models of chromosome evolution. *PLoS Comput. Biol.* 2, 100–111.  
1457 <https://doi.org/10.1371/journal.pcbi.0020014>
- 1458 Peto, H., Roe, F.J.C., Lee, P.N., Levy, L., Clack, J., 1975. Cancer and ageing in mice and  
1459 men. *Br. J. Cancer* 32, 411–426. <https://doi.org/10.1038/bjc.1975.242>
- 1460 Pettersen, E.F., Goddard, T.D., Huang, C.C., Meng, E.C., Couch, G.S., Croll, T.I., Morris,  
1461 J.H., Ferrin, T.E., 2021. <scp>UCSF ChimeraX</scp>□: Structure visualization for  
1462 researchers, educators, and developers. *Protein Sci.* 30, 70–82.  
1463 <https://doi.org/10.1002/pro.3943>

- 1464 Picard, M., Hepple, R.T., Buelle, Y., 2012. Mitochondrial functional specialization in  
1465 glycolytic and oxidative muscle fibers: Tailoring the organelle for optimal function. *Am.*  
1466 *J. Physiol. - Cell Physiol.* <https://doi.org/10.1152/ajpcell.00368.2011>
- 1467 Pickrell, J.K., Pai, A.A., Gilad, Y., Pritchard, J.K., 2010. Noisy splicing drives mRNA  
1468 isoform diversity in human cells. *PLoS Genet.* 6, 1–11.
- 1469 Pierrel, F., Bestwick, M.L., Cobine, P.A., Khalimonchuk, O., Cricco, J.A., Winge, D.R.,  
1470 2007. Coa1 links the Mss51 post-translational function to Cox1 cofactor insertion in  
1471 cytochrome c oxidase assembly. *EMBO J.* 26, 4335–4346.  
1472 <https://doi.org/10.1038/sj.emboj.7601861>
- 1473 Polymeropoulos, E.T., Jastroch, M., Frappell, P.B., 2012. Absence of adaptive nonshivering  
1474 thermogenesis in a marsupial, the fat-tailed dunnart (*Sminthopsis crassicaudata*). *J.*  
1475 *Comp. Physiol. B Biochem. Syst. Environ. Physiol.* 182, 393–401.  
1476 <https://doi.org/10.1007/s00360-011-0623-x>
- 1477 Popadin, K.Y., Nikolaev, S.I., Junier, T., Baranova, M., Antonarakis, S.E., 2013. Purifying  
1478 selection in mammalian mitochondrial protein-coding genes is highly effective and  
1479 congruent with evolution of nuclear genes. *Mol. Biol. Evol.* 30, 347–355.  
1480 <https://doi.org/10.1093/molbev/mss219>
- 1481 Qiu, Q., Zhang, G., Ma, T., Qian, W., Ye, Z., Cao, C., Hu, Q., Kim, J., Larkin, D.M., Auvil,  
1482 L., Capitanu, B., Ma, J., Lewin, H.A., Qian, X., Lang, Y., Zhou, R., Wang, L., Wang,  
1483 K., Xia, J., Liao, S., Pan, S., Lu, X., Hou, H., Wang, Y., Zang, X., Yin, Y., Ma, H.,  
1484 Zhang, J., Wang, Z., Zhang, Yingmei, Zhang, D., Yonezawa, T., Hasegawa, M., Zhong,  
1485 Y., Liu, W., Zhang, Yan, Huang, Z., Zhang, S., Long, R., Yang, H., Lenstra, J.A.,  
1486 Cooper, D.N., Wu, Y., Wang, Jun, Shi, P., Wang, Jian, Liu, J., Wang, Junyis, 2012. The  
1487 yak genome and adaptation to life at high altitude. *Nat. Genet.* 44, 946–949.  
1488 <https://doi.org/10.1038/ng.2343>
- 1489 Ramensky, V.E., Nurtdinov, R.N., Neverov, A.D., Mironov, A.A., Gelfand, M.S., 2008.  
1490 Positive Selection in Alternatively Spliced Exons of Human Genes. *Am. J. Hum. Genet.*  
1491 83, 94–98. <https://doi.org/10.1016/j.ajhg.2008.05.017>
- 1492 Remmert, M., Biegert, A., Hauser, A., Söding, J., 2012. HHblits: Lightning-fast iterative  
1493 protein sequence searching by HMM-HMM alignment. *Nat. Methods* 9, 173–175.  
1494 <https://doi.org/10.1038/nmeth.1818>
- 1495 Resnicow, D.I., Deacon, J.C., Warrick, H.M., Spudich, J.A., Leinwand, L.A., 2010.  
1496 Functional diversity among a family of human skeletal muscle myosin motors. *Proc.*  
1497 *Natl. Acad. Sci. U. S. A.* 107, 1053–1058. <https://doi.org/10.1073/pnas.0913527107>
- 1498 Rhie, A., McCarthy, S.A., Fedrigo, O., Damas, J., Formenti, G., Koren, S., Uliano-Silva, M.,  
1499 Chow, W., Functamman, A., Kim, J., Lee, C., Ko, B.J., Chaisson, M., Gedman, G.L.,  
1500 Cantin, L.J., Thibaud-Nissen, F., Haggerty, L., Bista, I., Smith, M., Haase, B.,  
1501 Mountcastle, J., Winkler, S., Paez, S., Howard, J., Vernes, S.C., Lama, T.M., Grutzner,  
1502 F., Warren, W.C., Balakrishnan, C.N., Burt, D., George, J.M., Biegler, M.T., Iorns, D.,  
1503 Digby, A., Eason, D., Robertson, B., Edwards, T., Wilkinson, M., Turner, G., Meyer, A.,  
1504 Kautt, A.F., Franchini, P., Detrich, H.W., Svoldal, H., Wagner, M., Naylor, G.J.P.,  
1505 Pippel, M., Malinsky, M., Mooney, M., Simbirsky, M., Hannigan, B.T., Pesout, T.,  
1506 Houck, M., Misuraca, A., Kingan, S.B., Hall, R., Kronenberg, Z., Sović, I., Dunn, C.,  
1507 Ning, Z., Hastie, A., Lee, J., Selvaraj, S., Green, R.E., Putnam, N.H., Gut, I., Ghurye, J.,

- 1508 Garrison, E., Sims, Y., Collins, J., Pelan, S., Torrance, J., Tracey, A., Wood, J., Dagnew,  
1509 R.E., Guan, D., London, S.E., Clayton, D.F., Mello, C. V., Friedrich, S.R., Lovell, P. V.,  
1510 Osipova, E., Al-Ajli, F.O., Secomandi, S., Kim, H., Theofanopoulou, C., Hiller, M.,  
1511 Zhou, Y., Harris, R.S., Makova, K.D., Medvedev, P., Hoffman, J., Masterson, P., Clark,  
1512 K., Martin, F., Howe, Kevin, Flicek, P., Walenz, B.P., Kwak, W., Clawson, H.,  
1513 Diekhans, M., Nassar, L., Paten, B., Kraus, R.H.S., Crawford, A.J., Gilbert, M.T.P.,  
1514 Zhang, G., Venkatesh, B., Murphy, R.W., Koepfli, K.-P., Shapiro, B., Johnson, W.E., Di  
1515 Palma, F., Marques-Bonet, T., Teeling, E.C., Warnow, T., Graves, J.M., Ryder, O.A.,  
1516 Haussler, D., O'Brien, S.J., Korch, J., Lewin, H.A., Howe, Kerstin, Myers, E.W.,  
1517 Durbin, R., Phillippy, A.M., Jarvis, E.D., 2021. Towards complete and error-free  
1518 genome assemblies of all vertebrate species. *Nature* 592, 737–746.  
1519 <https://doi.org/10.1038/s41586-021-03451-0>
- 1520 Robinson, J.T., Thorvaldsdóttir, H., Winckler, W., Guttman, M., Lander, E.S., Getz, G.,  
1521 Mesirov, J.P., 2011. Integrative genomics viewer. *Nat. Biotechnol.* 29, 24–6.
- 1522 Ruiz-Herrera, A., Castresana, J., Robinson, T.J., 2006. Is mammalian chromosomal evolution  
1523 driven by regions of genome fragility? *Genome Biol.* 7, R115.  
1524 <https://doi.org/10.1186/gb-2006-7-12-r115>
- 1525 Ruiz-Herrera, A., García, F., Giulotto, E., Attolini, C., Egozcue, J., Ponsà, M., Garcia, M.,  
1526 2005. Evolutionary breakpoints are co-localized with fragile sites and intrachromosomal  
1527 telomeric sequences in primates. *Cytogenet. Genome Res.* 108, 234–247.  
1528 <https://doi.org/10.1159/000080822>
- 1529 Sackton, T.B., Grayson, P., Cloutier, A., Hu, Z., Liu, J.S., Wheeler, N.E., Gardner, P.P.,  
1530 Clarke, J.A., Baker, A.J., Clamp, M., Edwards, S. V., 2019. Convergent regulatory  
1531 evolution and loss of flight in paleognathous birds. *Science* (80- ). 364, 74–78.  
1532 <https://doi.org/10.1126/science.aat7244>
- 1533 Samuels, J.X., Van Valkenburgh, B., 2008. Skeletal indicators of locomotor adaptations in  
1534 living and extinct rodents. *J. Morphol.* 269, 1387–1411.  
1535 <https://doi.org/10.1002/jmor.10662>
- 1536 San Mauro, D., Gower, D.J., Zardoya, R., Wilkinson, M., 2006. A hotspot of gene order  
1537 rearrangement by tandem duplication and random loss in the vertebrate mitochondrial  
1538 genome. *Mol. Biol. Evol.* 23, 227–234. <https://doi.org/10.1093/molbev/msj025>
- 1539 Sayol, F., Steinbauer, M.J., Blackburn, T.M., Antonelli, A., Faurby, S., 2020. Anthropogenic  
1540 extinctions conceal widespread evolution of flightlessness in birds. *Sci. Adv.* 6,  
1541 eabb6095. <https://doi.org/10.1126/sciadv.abb6095>
- 1542 Schiaffino, S., Reggiani, C., 2011. Fiber types in Mammalian skeletal muscles. *Physiol. Rev.*  
1543 91, 1447–1531. <https://doi.org/10.1152/physrev.00031.2010>
- 1544 Schibler, L., Roig, A., Mahe, M.F., Laurent, P., Hayes, H., Rodolphe, F., Cribiu, E.P., 2006.  
1545 High-resolution comparative mapping among man, cattle and mouse suggests a role for  
1546 repeat sequences in mammalian genome evolution. *BMC Genomics* 7, 194.  
1547 <https://doi.org/10.1186/1471-2164-7-194>
- 1548 Schneider, K., Adams, C.E., Elmer, K.R., 2019. Parallel selection on ecologically relevant  
1549 gene functions in the transcriptomes of highly diversifying salmonids. *BMC Genomics*  
1550 20, 1–23. <https://doi.org/10.1186/s12864-019-6361-2>

- 1551 Sharma, S., Shinde, S.S., Teekas, L., Vijay, N., 2020. Evidence for the loss of plasminogen  
1552 receptor KT gene in chicken. *Immunogenetics* 72, 507–515.  
1553 <https://doi.org/10.1007/s00251-020-01186-2>
- 1554 Sharma, V., Hecker, N., Walther, F., Stuckas, H., Hiller, M., Yeager, M., 2020. Convergent  
1555 Losses of TLR5 Suggest Altered Extracellular Flagellin Detection in Four Mammalian  
1556 Lineages. *Mol. Biol. Evol.* 37, 1847–1854. <https://doi.org/10.1093/molbev/msaa058>
- 1557 Sharma, V., Hiller, M., 2018. Loss of Enzymes in the Bile Acid Synthesis Pathway Explains  
1558 Differences in Bile Composition among Mammals. *Genome Biol. Evol.* 10, 3211–3217.  
1559 <https://doi.org/https://doi.org/10.1093/gbe/evy243>
- 1560 Shen, W., Le, S., Li, Y., Hu, F., 2016. SeqKit: A cross-platform and ultrafast toolkit for  
1561 FASTA/Q file manipulation. *PLoS One* 11, e0163962.  
1562 <https://doi.org/10.1371/journal.pone.0163962>
- 1563 Shen, Y.Y., Liang, L., Zhu, Z.H., Zhou, W.P., Irwin, D.M., Zhang, Y.P., 2010. Adaptive  
1564 evolution of energy metabolism genes and the origin of flight in bats. *Proc. Natl. Acad.  
1565 Sci. U. S. A.* 107, 8666–8671. <https://doi.org/10.1073/pnas.0912613107>
- 1566 Shen, Y.Y., Shi, P., Sun, Y.B., Zhang, Y.P., 2009. Relaxation of selective constraints on  
1567 avian mitochondrial DNA following the degeneration of flight ability. *Genome Res.* 19,  
1568 1760–1765. <https://doi.org/10.1101/gr.093138.109>
- 1569 Shinde, S.S., Teekas, L., Sharma, S., Vijay, N., 2019. Signatures of Relaxed Selection in the  
1570 CYP8B1 Gene of Birds and Mammals. *J. Mol. Evol.* 87, 209–220.  
1571 <https://doi.org/https://doi.org/10.1007/s00239-019-09903-6>
- 1572 Signes, A., Fernandez-Vizarra, E., 2018. Assembly of mammalian oxidative phosphorylation  
1573 complexes I–V and supercomplexes. *Essays Biochem.*  
1574 <https://doi.org/10.1042/EBC20170098>
- 1575 Sloan, D.B., Warren, J.M., Williams, A.M., Wu, Z., Abdel-Ghany, S.E., Chicco, A.J., Havird,  
1576 J.C., 2018. Cytonuclear integration and co-evolution. *Nat. Rev. Genet.*  
1577 <https://doi.org/10.1038/s41576-018-0035-9>
- 1578 Steinegger, M., Meier, M., Mirdita, M., Vöhringer, H., Haunsberger, S.J., Söding, J., 2019.  
1579 HH-suite3 for fast remote homology detection and deep protein annotation. *BMC  
1580 Bioinformatics* 20. <https://doi.org/10.1186/s12859-019-3019-7>
- 1581 Szklarczyk, R., Wanschers, B.F.J., Cuypers, T.D., Esseling, J.J., Riemersma, M., Van Den  
1582 Brand, M.A.M., Gloerich, J., Lasonder, E., van den Heuvel, L.P., Nijtmans, L.G.,  
1583 Huynen, M.A., 2012. Iterative orthology prediction uncovers new mitochondrial  
1584 proteins and identifies C12orf62 as the human ortholog of COX14, a protein involved in  
1585 the assembly of cytochrome c oxidase. *Genome Biol.* 13. [https://doi.org/10.1186/gb-  
1586 2012-13-2-r12](https://doi.org/10.1186/gb-2012-13-2-r12)
- 1587 Talbot, J., Maves, L., 2016. Skeletal muscle fiber type: using insights from muscle  
1588 developmental biology to dissect targets for susceptibility and resistance to muscle  
1589 disease. *Wiley Interdiscip. Rev. Dev. Biol.* <https://doi.org/10.1002/wdev.230>
- 1590 Taylor, J.S., Raes, J., 2004. Duplication and divergence: The evolution of new genes and old  
1591 ideas. *Annu. Rev. Genet.* <https://doi.org/10.1146/annurev.genet.38.072902.092831>

- 1592 Taylor, M.E., 1989. Locomotor Adaptations by Carnivores, in: *Carnivore Behavior, Ecology,*  
1593 *and Evolution.* Springer US, pp. 382–409. [https://doi.org/10.1007/978-1-4757-4716-](https://doi.org/10.1007/978-1-4757-4716-4_15)  
1594 [4\\_15](https://doi.org/10.1007/978-1-4757-4716-4_15)
- 1595 Thorvaldsdottir, H., Robinson, J.T., Mesirov, J.P., 2013. Integrative Genomics Viewer (IGV):  
1596 high-performance genomics data visualization and exploration. *Brief. Bioinform.* 14,  
1597 178–192. <https://doi.org/10.1093/bib/bbs017>
- 1598 Tian, R., Xu, S., Chai, S., Yin, D., Zakon, H., Yang, G., 2018. Stronger selective constraint  
1599 on downstream genes in the oxidative phosphorylation pathway of cetaceans. *J. Evol.*  
1600 *Biol.* 31, 217–228. <https://doi.org/10.1111/jeb.13213>
- 1601 Tollis, M., Boddy, A.M., Maley, C.C., 2017. Peto’s Paradox: How has evolution solved the  
1602 problem of cancer prevention? *BMC Biol.* <https://doi.org/10.1186/s12915-017-0401-7>
- 1603 Tollis, M., Robbins, J., Webb, A.E., Kuderna, L.F.K., Caulin, A.F., Garcia, J.D., Bèrubè, M.,  
1604 Pourmand, N., Marques-Bonet, T., O’Connell, M.J., Palsbøll, P.J., Maley, C.C., 2019.  
1605 Return to the Sea, Get Huge, Beat Cancer: An Analysis of Cetacean Genomes Including  
1606 an Assembly for the Humpback Whale (*Megaptera novaeangliae*). *Mol. Biol. Evol.* 36,  
1607 1746–1763. <https://doi.org/10.1093/molbev/msz099>
- 1608 Trinh, P., McLysaght, A., Sankoff, D., 2004. Genomic features in the breakpoint regions  
1609 between syntenic blocks. *Bioinformatics* 20, i318–i325.  
1610 <https://doi.org/10.1093/bioinformatics/bth934>
- 1611 Urantówka, A.D., Krocak, A., Mackiewicz, P., 2020. New view on the organization and  
1612 evolution of Palaeognathae mitogenomes poses the question on the ancestral gene  
1613 rearrangement in Aves. *BMC Genomics* 21, 1–25. [https://doi.org/10.1186/s12864-020-](https://doi.org/10.1186/s12864-020-07284-5)  
1614 [07284-5](https://doi.org/10.1186/s12864-020-07284-5)
- 1615 Valente, R., Alves, L.Q., Nabais, M., Alves, F., Sousa-Pinto, I., Ruivo, R., Castro, L.F.C.,  
1616 2020. Convergent Cortistatin losses parallel modifications in circadian rhythmicity and  
1617 energy homeostasis in Cetacea and other mammalian lineages. *Genomics.*  
1618 <https://doi.org/10.1016/j.ygeno.2020.11.002>
- 1619 Van Der Lee, R., Wiel, L., Van Dam, T.J.P., Huynen, M.A., 2017. Genome-scale detection of  
1620 positive selection in nine primates predicts human-virus evolutionary conflicts. *Nucleic*  
1621 *Acids Res.* 45, 10634–10648. <https://doi.org/10.1093/nar/gkx704>
- 1622 van Esveld, S.L., Huynen, M.A., 2018. Does mitochondrial DNA evolution in metazoa drive  
1623 the origin of new mitochondrial proteins? *IUBMB Life* 70, 1240–1250.  
1624 <https://doi.org/10.1002/iub.1940>
- 1625 Vazquez, J.M., Sulak, M., Chigurupati, S., Lynch, V.J., 2018. A Zombie LIF Gene in  
1626 Elephants Is Upregulated by TP53 to Induce Apoptosis in Response to DNA Damage.  
1627 *Cell Rep.* <https://doi.org/10.1016/j.celrep.2018.07.042>
- 1628 Vijay, N., 2020. Loss of inner kinetochore genes is associated with the transition to an  
1629 unconventional point centromere in budding yeast. *PeerJ* 8.  
1630 <https://doi.org/10.7717/peerj.10085>
- 1631 Wang, C., Richter □ Dennerlein, R., Pacheu □ Grau, D., Liu, F., Zhu, Y., Dennerlein, S.,  
1632 Rehling, P., 2020. MITRAC15/COA1 promotes mitochondrial translation in a ND2



- 1633 ribosome–nascent chain complex. *EMBO Rep.* 21.  
1634 <https://doi.org/10.15252/embr.201948833>
- 1635 Waterhouse, A., Bertoni, M., Bienert, S., Studer, G., Tauriello, G., Gumienny, R., Heer, F.T.,  
1636 De Beer, T.A.P., Rempfer, C., Bordoli, L., Lepore, R., Schwede, T., 2018. SWISS-  
1637 MODEL: Homology modelling of protein structures and complexes. *Nucleic Acids Res.*  
1638 46, W296–W303. <https://doi.org/10.1093/nar/gky427>
- 1639 Webb, B., Sali, A., 2016. Comparative protein structure modeling using MODELLER. *Curr.*  
1640 *Protoc. Bioinforma.* 2016, 5.6.1-5.6.37. <https://doi.org/10.1002/cpbi.3>
- 1641 Weeks, O.I., 1989. Vertebrate Skeletal Muscle: Power Source for Locomotion. *Bioscience*  
1642 39, 791–799. <https://doi.org/10.2307/1311185>
- 1643 Weiss, A., Leinwand, L.A., 1996. The mammalian myosin heavy chain gene family. *Annu.*  
1644 *Rev. Cell Dev. Biol.* <https://doi.org/10.1146/annurev.cellbio.12.1.417>
- 1645 Welch, A.J., Bedoya-Reina, O.C., Carretero-Paulet, L., Miller, W., Rode, K.D., Lindqvist, C.,  
1646 2014. Polar bears exhibit genome-wide signatures of bioenergetic adaptation to life in  
1647 the arctic environment. *Genome Biol. Evol.* 6, 433–450.  
1648 <https://doi.org/10.1093/gbe/evu025>
- 1649 Welch, K.C., Altshuler, D.L., 2009. Fiber type homogeneity of the flight musculature in  
1650 small birds. *Comp. Biochem. Physiol. - B Biochem. Mol. Biol.* 152, 324–331.  
1651 <https://doi.org/10.1016/j.cbpb.2008.12.013>
- 1652 Wertheim, J.O., Murrell, B., Smith, M.D., Kosakovsky Pond, S.L., Scheffler, K., 2015.  
1653 RELAX: Detecting Relaxed Selection in a Phylogenetic Framework. *Mol. Biol. Evol.*  
1654 32, 820–832.
- 1655 Williams, T.M., Dobson, G.P., Mathieu-Costello, O., Morsbach, D., Worley, M.B., Phillips,  
1656 J.A., 1997. Skeletal muscle histology and biochemistry of an elite sprinter, the African  
1657 cheetah. *J. Comp. Physiol. - B Biochem. Syst. Environ. Physiol.* 167, 527–535.  
1658 <https://doi.org/10.1007/s003600050105>
- 1659 Wilson, A.M., Lowe, J.C., Roskilly, K., Hudson, P.E., Golabek, K.A., McNutt, J.W., 2013.  
1660 Locomotion dynamics of hunting in wild cheetahs. *Nature* 498, 185–189.  
1661 <https://doi.org/10.1038/nature12295>
- 1662 Wilson, J.W., Mills, M.G.L., Wilson, R.P., Peters, G., Mills, M.E.J., Speakman, J.R., Durant,  
1663 S.M., Bennett, N.C., Marks, N.J., Scantlebury, M., 2013. Cheetahs, *Acinonyx jubatus*,  
1664 balance turn capacity with pace when chasing prey. *Biol. Lett.* 9.  
1665 <https://doi.org/10.1098/rsbl.2013.0620>
- 1666 Wu, W., Schmidt, T.R., Goodman, M., Grossman, L.I., 2000. Molecular evolution of  
1667 cytochrome c oxidase subunit I in primates: Is there coevolution between mitochondrial  
1668 and nuclear genomes? *Mol. Phylogenet. Evol.* 17, 294–304.  
1669 <https://doi.org/10.1006/mpev.2000.0833>
- 1670 Xing, Y., Lee, C.J., 2004. Negative selection pressure against premature protein truncation is  
1671 reduced by alternative splicing and diploidy. *Trends Genet.*  
1672 <https://doi.org/10.1016/j.tig.2004.07.009>
- 1673 Xiong, Y., Lei, F., 2020. SLC2A12 of SLC2 gene family in bird provides functional

- 1674 compensation for the loss of SLC2A4 gene in other vertebrates. *Mol. Biol. Evol.*  
1675 <https://doi.org/10.1093/molbev/msaa286>
- 1676 Xue, Y., Li, P.-D., Tang, X.-M., Yan, Z.-H., Xia, S.-S., Tian, H.-P., Liu, Z.-L., Zhou, T.,  
1677 Tang, X.-G., Zhang, G.-J., 2020. <p>Cytochrome C Oxidase Assembly Factor 1  
1678 Homolog Predicts Poor Prognosis and Promotes Cell Proliferation in Colorectal Cancer  
1679 by Regulating PI3K/AKT Signaling</p>. *Oncotargets Ther.* Volume 13, 11505–  
1680 11516. <https://doi.org/10.2147/OTT.S279024>
- 1681 Yang, Z., 2007. PAML 4: Phylogenetic Analysis by Maximum Likelihood. *Mol. Biol. Evol.*  
1682 24, 1586–1591. <https://doi.org/10.1093/molbev/msm088>
- 1683 Zhang, F., Broughton, R.E., 2015. Heterogeneous natural selection on oxidative  
1684 phosphorylation genes among fishes with extreme high and low aerobic performance.  
1685 *BMC Evol. Biol.* 15, 173. <https://doi.org/10.1186/s12862-015-0453-7>
- 1686 Zhong, W.W.H., Lucas, C.A., Hoh, J.F.Y., 2008. Myosin isoforms and fibre types in limb  
1687 muscles of Australian marsupials: Adaptations to hopping and non-hopping locomotion.  
1688 *J. Comp. Physiol. B Biochem. Syst. Environ. Physiol.* 178, 47–55.  
1689 <https://doi.org/10.1007/s00360-007-0198-8>
- 1690 Zhong, W.W.H., Lucas, C.A., Kang, L.H.D., Hoh, J.F.Y., 2001. Electrophoretic and  
1691 immunochemical evidence showing that marsupial limb muscles express the same fast  
1692 and slow myosin heavy chains as eutherians. *Electrophoresis* 22, 1016–1020.  
1693 [https://doi.org/10.1002/1522-2683\(200106\)22:6<1016::AID-ELPS1016>3.0.CO;2-K](https://doi.org/10.1002/1522-2683(200106)22:6<1016::AID-ELPS1016>3.0.CO;2-K)
- 1694 Zhou, X., Dou, Q., Fan, G., Zhang, Q., Sanderford, M., Kaya, A., Johnson, J., Karlsson, E.K.,  
1695 Tian, X., Mikhailchenko, A., Kumar, S., Seluanov, A., Zhang, Z.D., Gorbunova, V., Liu,  
1696 X., Gladyshev, V.N., 2020. Beaver and Naked Mole Rat Genomes Reveal Common  
1697 Paths to Longevity. *Cell Rep.* 32. <https://doi.org/10.1016/j.celrep.2020.107949>
- 1698 Zimmermann, L., Stephens, A., Nam, S.Z., Rau, D., Kübler, J., Lozajic, M., Gabler, F.,  
1699 Söding, J., Lupas, A.N., Alva, V., 2018. A Completely Reimplemented MPI  
1700 Bioinformatics Toolkit with a New HHpred Server at its Core. *J. Mol. Biol.* 430, 2237–  
1701 2243. <https://doi.org/10.1016/j.jmb.2017.12.007>

1702

## 1703 **Figure legends**

1704 **Figure 1:** *COA1/MITRAC15* and *TIMM21* are distant homologs with similar amino acid  
1705 sequence profiles and secondary structures. (A) Cluster map of *COA1/MITRAC15* homologs  
1706 identified using profile-profile search implemented in HHblits. The cluster of  
1707 *COA1/MITRAC15*: blue, *TIMM21*: red, homologs of *COA1/MITRAC15* from species of  
1708 fungi: orange, homologs of *COA1/MITRAC15* from bacterial species: light blue cluster and  
1709 diffuse brown cluster, *COA1/MITRAC15* homologs in plants, represented by *Arabidopsis*  
1710 *thaliana* homolog At2g20390: yellow, *TIMM21*-like proteins that exist as duplicated copies  
1711 in plants, represented by *Arabidopsis thaliana* homolog At2g37940: magenta. (B) The output  
1712 of HHpred showing the alignment of human *COA1/MITRAC15* with yeast *TIMM21*. The  
1713 region in the box highlights the predicted transmembrane helix. (C) The predicted secondary  
1714 structure of human (*Homo sapiens*) *COA1/MITRAC15*. (D) The predicted secondary structure

1715 of yeast (*Saccharomyces cerevisiae*) *TIMM21*.

1716 **Figure 2:** Comparison of haplotypes of *COAI/MITRAC15* gene inferred based on sequencing  
1717 reads in different species visualized in IGV browser. (A) Two haplotypes of  
1718 *COAI/MITRAC15* in humans (*Homo sapiens*) corresponding to the functional and  
1719 pseudogene copies. (B) Two haplotypes of exon 1 to exon 4 of *COAI/MITRAC15* in tiger  
1720 (*Panthera tigris*). (C) Two haplotypes in exon two and one haplotype of remaining exons of  
1721 *COAI/MITRAC15* in naked mole-rat (*Heterocephalus glaber*). (D) The single haplotype of  
1722 *COAI/MITRAC15* gene in chicken (*Gallus gallus*). (E) The single haplotype of  
1723 *COAI/MITRAC15* in the platypus (*Ornithorhynchus anatinus*). (F) The single haplotype of  
1724 *COAI/MITRAC15* in red squirrel (*Sciurus vulgaris*).

1725 **Figure 3:** Loss of *COAI/MITRAC15* gene in Feliform. (A) Gene loss event in *Acinonyx*  
1726 *jubatus* besides a time-calibrated phylogenetic tree downloaded from the time tree website.  
1727 (B) Gene order in the genomic region flanking the *COAI/MITRAC15* gene and its exons in  
1728 genomes. Red and blue arrows depict the direction of gene transcription relative to the  
1729 *COAI/MITRAC15* gene for consistency across species. Gray boxes represent the genes  
1730 located on short scaffolds with unknown orientation.

1731 **Figure 4:** Recurrent loss of *COAI/MITRAC15* gene in Galliform species. (A) Gene loss  
1732 events in ten Galliform species besides a time-calibrated phylogenetic tree downloaded from  
1733 the time tree website. Blue branches in the tree represent functional branches, and the  
1734 magenta-colored branches represent mixed (functional + pseudogenic) branches. The method  
1735 proposed by Meredith et al., 2009 was used to estimate the time of gene loss using two  
1736 different substitution rates (1ds and 2ds). Short colored bars depict the locations of the gene  
1737 disrupting mutations on the four exons of *COAI/MITRAC15*. (B) Gene order in the genomic  
1738 region flanking the *COAI/MITRAC15* gene in bird genomes. Red and blue arrows depict the  
1739 direction of gene transcription relative to the *COAI/MITRAC15* gene for consistency across  
1740 species. Gray boxes represent the genes located on short scaffolds with unknown orientation.  
1741 (C) The gene expression pattern of the *COAI/MITRAC15* gene in six tissues (brain, spleen,  
1742 skin, liver, gonad, and blood) was assessed by screening RNA-seq datasets. The red-colored  
1743 blocks depict the robust expression of the *COAI/MITRAC15* gene, the black-colored blocks  
1744 depict a lack of *COAI/MITRAC15* gene expression in that particular tissue, and the white-  
1745 colored blocks represent a lack of data for that tissue.

1746 **Figure 5:** Comparison of different sequencing datasets of woolly mammoth (*Mammuthus*  
1747 *primigenius*) for *COAI/MITRAC15* gene exons. Gray rectangles show the reads mapped to  
1748 each exon. Panels A to F shows the reads with sequence supporting each exon from different  
1749 woolly mammoth SRA bio projects [PRJDB4697 (182 Gb), PRJEB42269 (179 Gb),  
1750 PRJNA397140 (155 Gb), PRJEB7929 (88.34 Gb), PRJEB29510 (162 Gb), and  
1751 PRJNA281811 (210 Gb)]. Panel G indicates the GC percentage vs. K-mer abundance of  
1752 different project IDs mentioned in different colors. The vertical dotted lines in orange denote  
1753 the GC percentage of *TIMM21* exons, and vertical solid lines in red indicate the GC  
1754 percentage of *COAI/MITRAC15* exons.

1755 **Figure 6:** Recurrent loss of *COAI/MITRAC15* gene in rodent species. (A) Gene loss events in  
1756 seven rodent species through four events are represented exon-wise beside the pink-colored  
1757 branches of the time-calibrated phylogenetic tree obtained from the time tree website. Blue  
1758 branches correspond to functional copies of *COAI/MITRAC15*, and black branches  
1759 correspond to the Evolutionary Breakpoint Region (EBR) (B). Gene order in the genomic  
1760 region flanking the *COAI/MITRAC15* gene in rodent genomes. Arrows depict the direction of  
1761 gene transcription relative to the *COAI/MITRAC15* gene for consistency across species.  
1762 Boxes represent the genes located on short scaffolds with unknown orientation. Each dotted  
1763 box contains one type of gene order, and the brown arrows highlighted in yellow emerging  
1764 from gene order O5 depict the EBR event that leads to gene orders O6, O7, O8, and O9. Gene  
1765 order O8 and O7 contain partial remains of the *COAI/MITRAC15* gene and a functional  
1766 *BLVRA* gene, respectively. A solid red line within gene order O8 depicts the partial exon one  
1767 and intron 2 of *COAI/MITRAC15* located between the *PTPRF* and *HYI* genes. The gene  
1768 order O6 and O9 correspond to the regions on the left and right flanks of the region  
1769 containing *STK17A*, *COAI/MITRAC15*, and *BLVRA*.

1770 **Figure 7:** The genomic region spanning the *COAI/MITRAC15* gene coincides with an  
1771 evolutionary breakpoint (EBR). (A) The phylogenetic relationship between marsupial species  
1772 along with few outgroup species. The phylogenetic tree is from the time tree website. (B) The  
1773 gene order in the region flanking the *COAI/MITRAC15* gene. The arrows show the direction  
1774 of gene transcription relative to the *COAI/MITRAC15* gene for consistency across species.  
1775 Each dotted box contains one type of gene order, and the red arrows from gene order O1  
1776 depict the EBR event that leads to gene orders O2 and O3 in the six marsupial species. The  
1777 outgroup species have the Pre-EBR gene order O1. In the post-EBR gene orders O2 and O3,  
1778 the *COAI/MITRAC15* gene occurs in the EBR, and the gene order of flanking genes is  
1779 changed. A functional *COAI/MITRAC15* can be identified in the outgroup species but is  
1780 presumably lost in marsupial species as it is missing in the genome assembly and raw read  
1781 datasets.

A

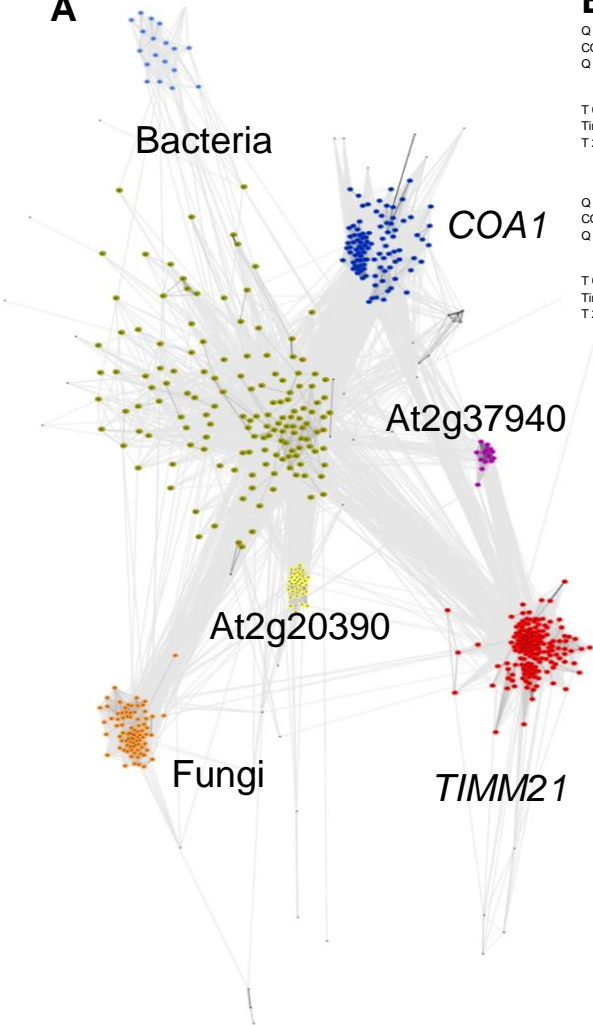

B

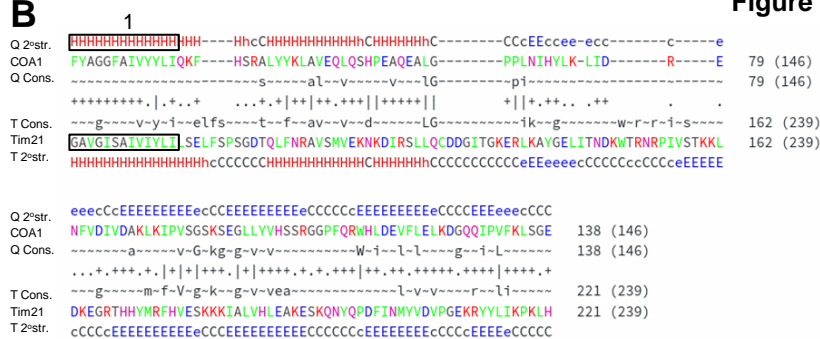

## Alignment of COA1 &amp; TIMM21

C

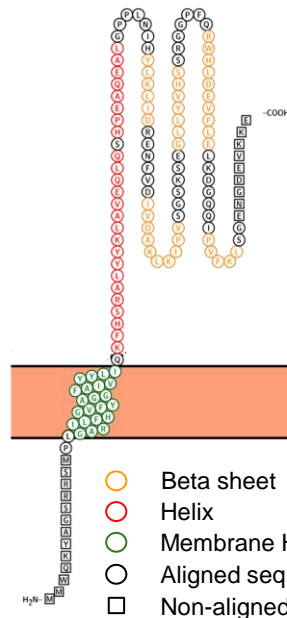

D

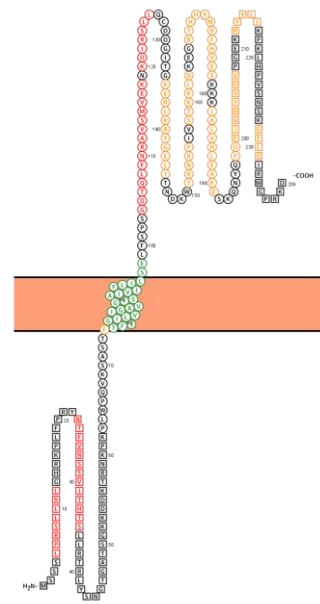

## Haplotypes of COA1

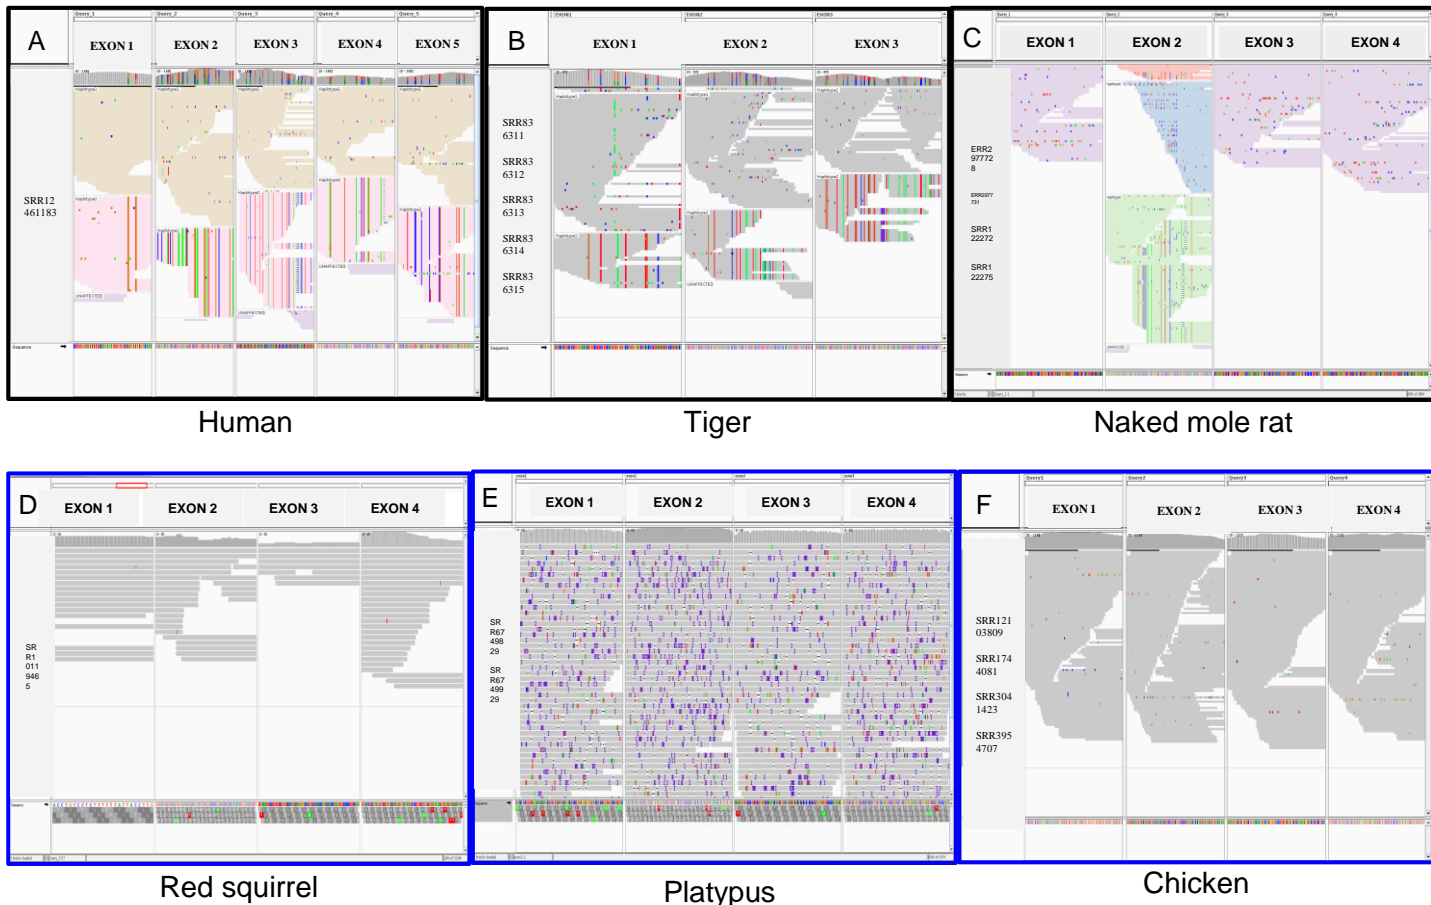

## A Gene loss events

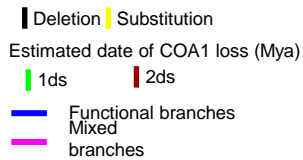

## B Gene Synteny

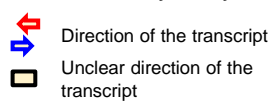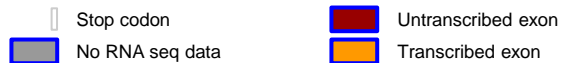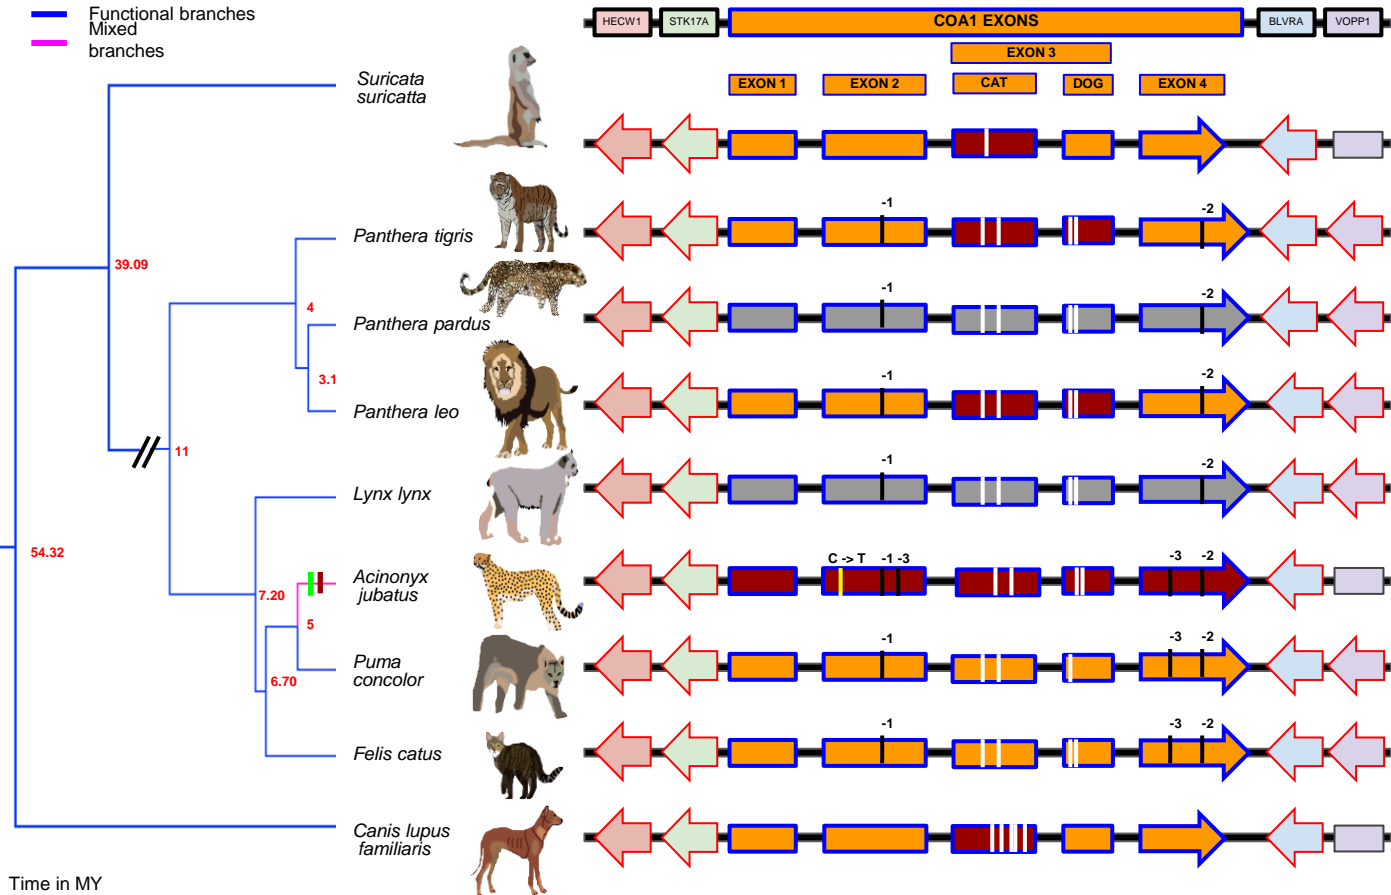

## A Gene loss events

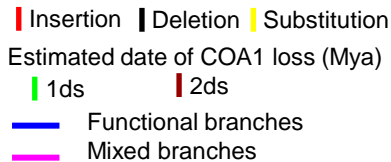

## B Gene Synteny

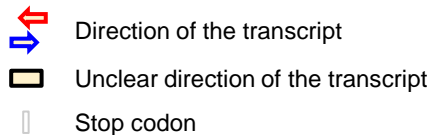

## C Expression pattern

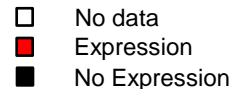

| Tissue |        |      |       |       |       |  |
|--------|--------|------|-------|-------|-------|--|
| Brain  | Spleen | Skin | Liver | Gonad | Blood |  |

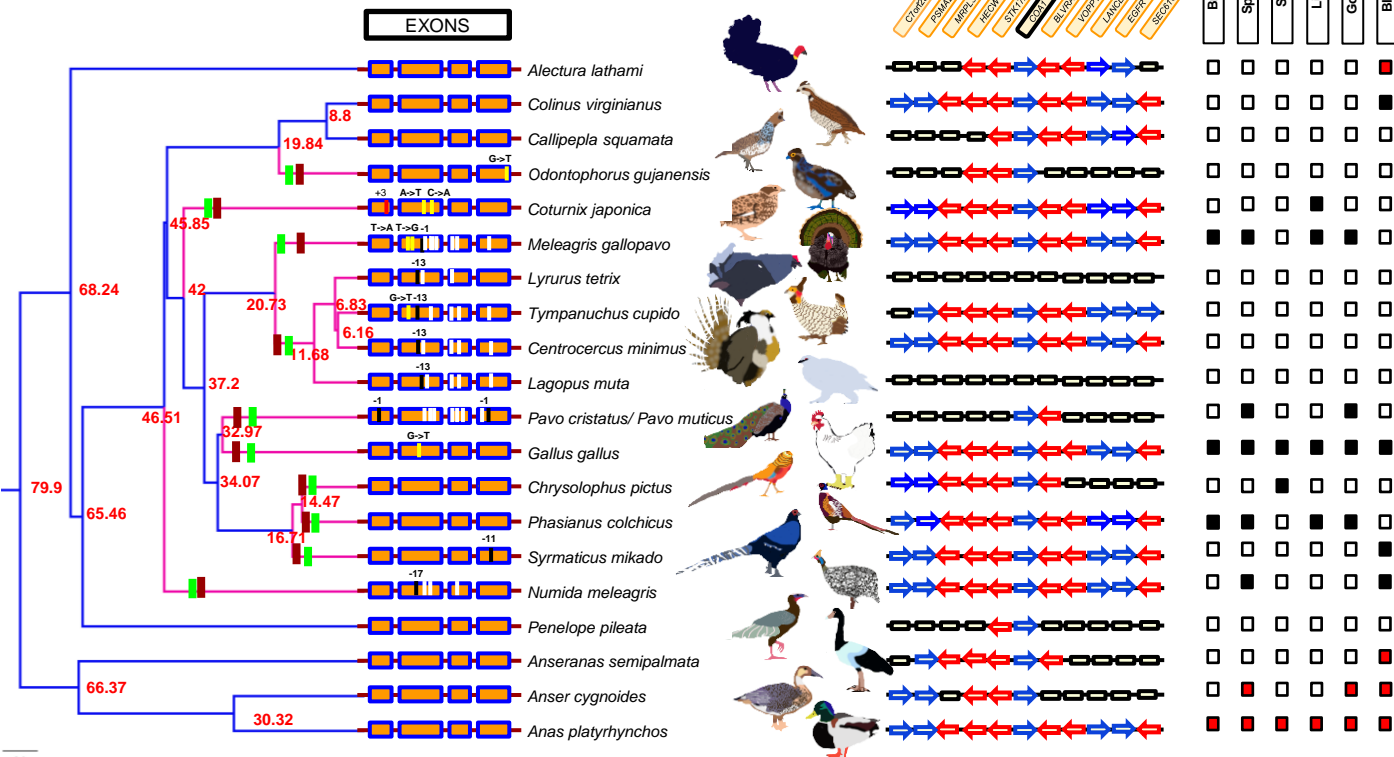



Comparison of *Mammuthus primigenius* (woolly mammoth)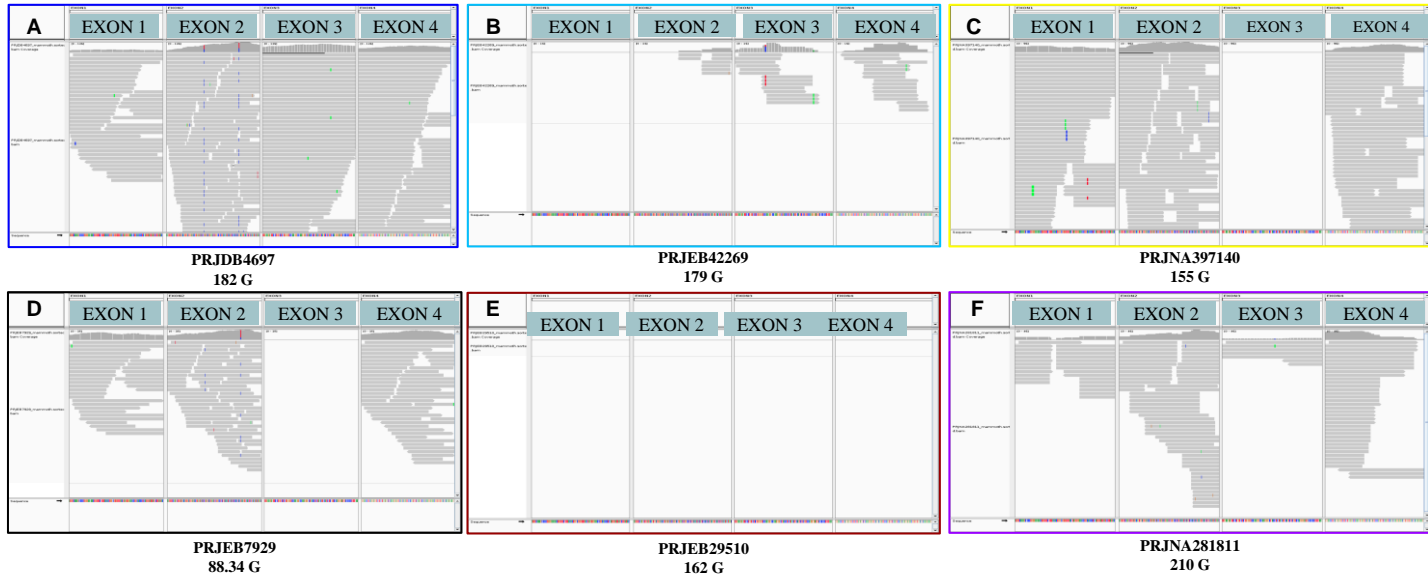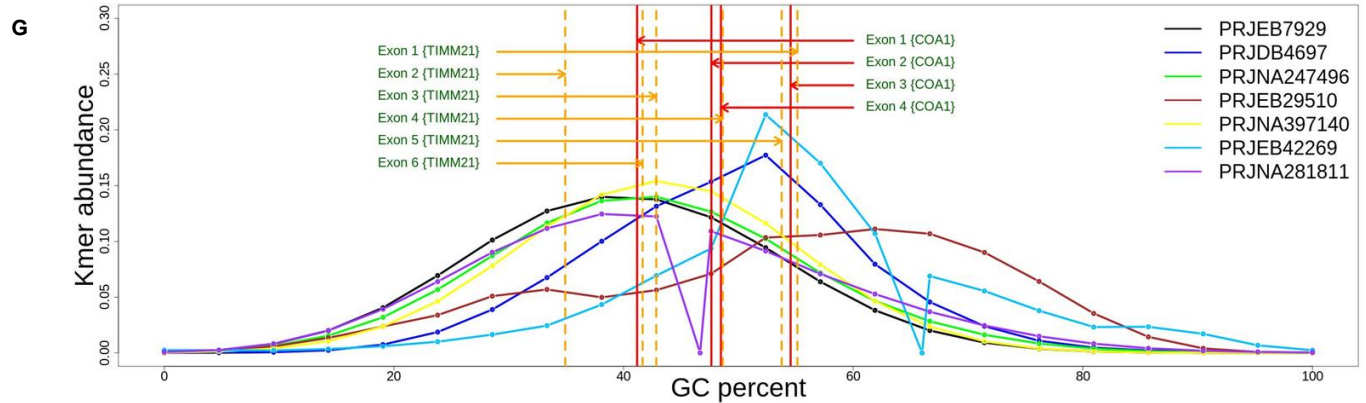

## A Gene loss events

Estimated date for COA1 loss (Mya)

1ds

2ds

Insertion

Deletion

Substitution

Stop codon

— COA1 in EBR  
 — Functional  
 — Mixed

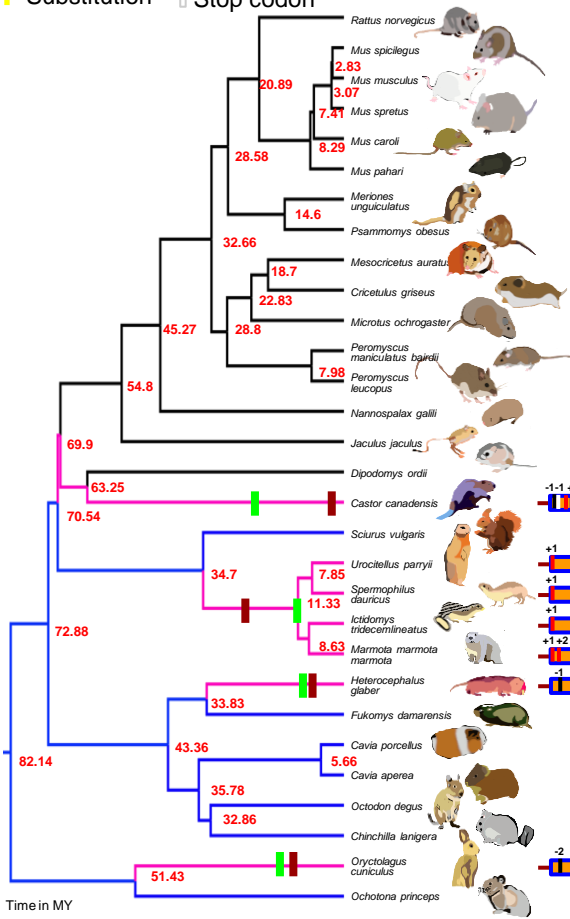

## B Gene Synteny

□ Unclear direction of the transcript

↔ Direction of the transcript

— Truncated Exon 1 and Intron 2 of COA1

□ Partial sequence

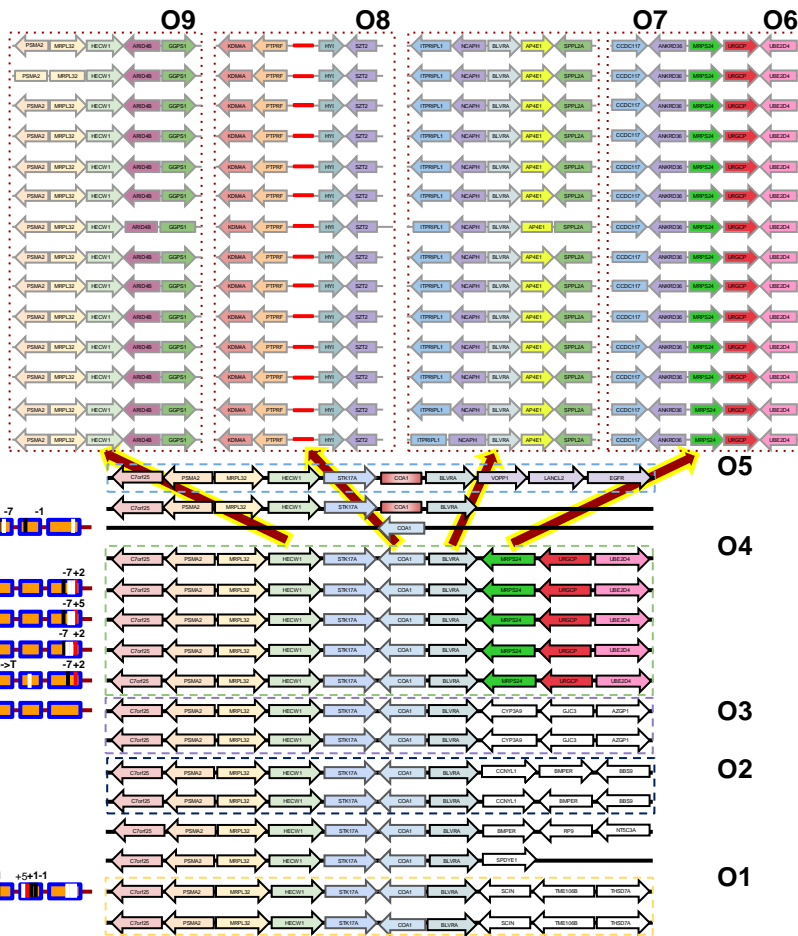

## A Gene loss events

— COA1 Present — COA1 in EBR

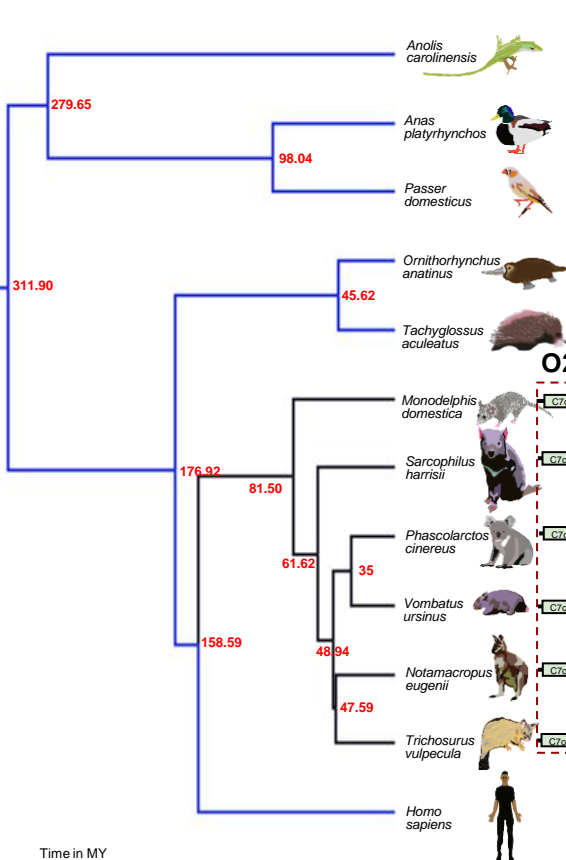

## B Gene Synteny

↔ Direction of the transcript □ Unclear direction of the transcript

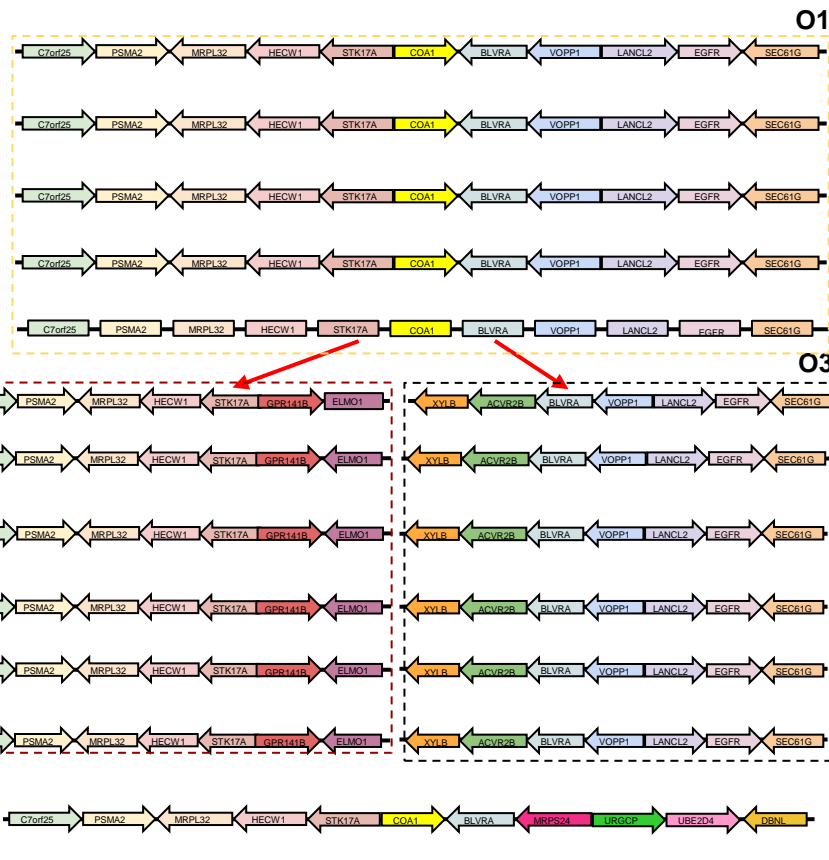

Time in MY
